# Supplementary material for: Role of body mass category in the development of faulty postures in school-age children from a rural area in south-eastern Poland: a cross-sectional study
Source: PubMed Central journal article supplement — BMJ Open. 2019 Nov 7;9(11):e030610. doi: 10.1136/bmjopen-2019-030610 (PMC6858177; doi:10.1136/bmjopen-2019-030610), 2019-11-07
Supplement: bmjopen-2019-030610.draft_revisions.pdf [file bmjopen-2019-030610.draft_revisions.pdf]

# BMJ Open

BMJ Open is committed to open peer review. As part of this commitment we make the peer review history of every article we publish publicly available.

When an article is published we post the peer reviewers' comments and the authors' responses online. We also post the versions of the paper that were used during peer review. These are the versions that the peer review comments apply to.

The versions of the paper that follow are the versions that were submitted during the peer review process. They are not the versions of record or the final published versions. They should not be cited or distributed as the published version of this manuscript.

BMJ Open is an open access journal and the full, final, typeset and author-corrected version of record of the manuscript is available on our site with no access controls, subscription charges or pay-per-view fees (<http://bmjopen.bmj.com>).

If you have any questions on BMJ Open's open peer review process please email [info.bmjopen@bmj.com](mailto:info.bmjopen@bmj.com)

# BMJ Open

## The role of body mass category in the development of faulty postures in school age children from rural areas

|                               |                                                                                                                                                                                                                                                                                                                                                                                                                                                                                                                                                                                                                                                                                                                                                                                        |
|-------------------------------|----------------------------------------------------------------------------------------------------------------------------------------------------------------------------------------------------------------------------------------------------------------------------------------------------------------------------------------------------------------------------------------------------------------------------------------------------------------------------------------------------------------------------------------------------------------------------------------------------------------------------------------------------------------------------------------------------------------------------------------------------------------------------------------|
| Journal:                      | <i>BMJ Open</i>                                                                                                                                                                                                                                                                                                                                                                                                                                                                                                                                                                                                                                                                                                                                                                        |
| Manuscript ID                 | bmjopen-2019-030610                                                                                                                                                                                                                                                                                                                                                                                                                                                                                                                                                                                                                                                                                                                                                                    |
| Article Type:                 | Research                                                                                                                                                                                                                                                                                                                                                                                                                                                                                                                                                                                                                                                                                                                                                                               |
| Date Submitted by the Author: | 22-Mar-2019                                                                                                                                                                                                                                                                                                                                                                                                                                                                                                                                                                                                                                                                                                                                                                            |
| Complete List of Authors:     | Rusek, Wojciech; Rehabilitation Centre REHAMED-CENTER, Tajęcina 66a, 36- 002 Tajęcina, Poland<br>Leszczak, Justyna; University of Rzeszow, Faculty of Medicine, Institute of Physiotherapy,<br>Baran, Joanna; Medical Faculty<br>Adamczyk, Marzena; RehaKlinika, 35-959 Rzeszów, Poland<br>Weres, Aneta; University of Rzeszow, Faculty of Medicine, Institute of Physiotherapy<br>Baran, Rafał; Rehabilitation Centre REHAMED-CENTER<br>Inglot, Grzegorz; Clinical Provincial Hospital No. 2, ul. Lwowska 60, 35-301 Rzeszów, Poland<br>Czenczek-Lewandowska, Ewelina; University of Rzeszow, Faculty of Medicine, Institute of Physiotherapy<br>Porada, Sławomir; Trzebownisko Commune Office<br>Pop, Teresa; University of Rzeszow, Faculty of Medicine, Institute of Physiotherapy |
| Keywords:                     | posture, body mass index, child, rural population                                                                                                                                                                                                                                                                                                                                                                                                                                                                                                                                                                                                                                                                                                                                      |

SCHOLARONE™  
Manuscripts

1  
2  
3 **The role of body mass category in the development of faulty postures in school age**  
4 **children from rural areas**  
5  
6  
7

8 Wojciech Rusek<sup>1</sup>, Justyna Leszczak<sup>1,2</sup>, Joanna Baran<sup>1,2</sup>, Marzena Adamczyk<sup>1,3</sup>, Aneta  
9 Weres<sup>2</sup>, Rafał Baran<sup>1</sup>, Grzegorz Inglot<sup>4</sup>, Ewelina Czenczek-Lewandowska<sup>2</sup>, Sławomir  
10 Porada<sup>5</sup>, Teresa Pop<sup>2</sup>  
11  
12  
13  
14

15 1. Rehabilitation Centre REHAMED-CENTER, Tajęcina 66a, 36- 002 Tajęcina, Poland

16 2. University of Rzeszow, Faculty of Medicine, Institute of Physiotherapy, Institute of Physiotherapy,  
17 Medical Faculty, University of Rzeszów Ul. Kopisto 2a, 35-959, Rzeszów, Poland

18 3. RehaKlinika, 35-959 Rzeszów, Poland

19 4. Clinical Provincial Hospital No. 2, ul. Lwowska 60, 35- 301 Rzeszów, Poland

20 5. Trzebownisko Commune Office, 36-001 Trzebownisko 976  
21  
22  
23  
24  
25  
26  
27  
28

29 **Corresponding Author**

30 Justyna Leszczak, Ph.D.

31 Email address: leszczakjustyna.ur@gmail.com

32 Institute of Physiotherapy, Medical Faculty, University of Rzeszów

33 Ul. Kopisto 2a

34 35-959, Rzeszów, Poland

35 ORCID: 0000-0001-8769-0048  
36  
37  
38  
39  
40  
41  
42  
43  
44  
45  
46  
47  
48  
49  
50  
51  
52  
53  
54  
55  
56  
57  
58  
59  
60

**Word count:** 3125

## Abstract

**Objective.** The aim of the study was to assess a relationship between Body Mass Index and incidence of abnormalities in selected parameters measured in the trunk area.

**Design.** Cross-sectional studies.

**Setting.** The research was conducted in a primary school in the rural area.

**Participants.** A group of 464 children, ranging in age from 6 to 16 years (234 boys and 230 girls), was recruited to participate in the study.

**Interventions:** Not applicable.

**Outcome Measures.** The examination of their body postures was conducted with the use of Zebris system. Body mass was determined using a body mass analyser Tanita MC – 780 MA. Body mass index (BMI) was calculated based on the acquired data.

**Results.** It has been noticed that people with overweight and obesity have incorrect position of the shoulders and pelvis in comparison to people with normal body weight. It was found that greater body mass (higher BMI index) coincided with a larger distance of the scapulae from the frontal plane ( $p=0.009$ ).

**Conclusions.** Occurrence of bad postures in children is connected with their body mass category. Excessive weight appears to foster asymmetric position of the shoulders and scapulae. A failure to reduce excessive body mass may lead to more pronounced postural defects in the future.

**Key words.** Posture, Body Mass Index, Child, Rural Population

### Strengths of this study

- The homogeneity and large size of the study group from rural areas.
- Objective and standardized measuring devices.
- Important and current issue confirming the connection between abnormal weight and incorrect body posture of the school-aged children

### Limitations of this study

- One important but underexplored methodological limitation in the body mass composition research is that BMI is an imperfect measure. Although BMI has an elevated fat mass, BMI is not associated with fat.
- Can not entirely rule out the possibility of unmeasured or unknown confounding factors (parental genetic predisposition to higher BMI) that may account for the associations observed in this study. However, the homogeneity of the study population and comprehensive data on the risk factors minimized potential confounding.
- The participants included in this study were children in school age of European ancestry and it is unknown whether this findings could be generalized to other demographic or ethnic groups.

### Introduction.

Child's correct body posture favourably affects the growth of the whole organism. It contributes for instance to the normal development and functioning of body organs, and improves effectiveness of motor activity and general well-being. If they are developed early in life, correct motor habits contribute to normal development of the muscles, joints and ligaments and provide beneficial stimulation to the child's growing skeleton. Even the smallest defects in the body posture of a school-age child can lead to the development of a habitual bad posture and, consequently, to health problems<sup>1-2</sup>.

Body postures are subject to large changeability, which depends on such factors as age, sex, somatic type, ethnicity, environment and psychophysical condition. The major risk factors which may induce development of incorrect body posture include excessive body mass in relation to height and age<sup>3-4</sup>. Overweight and obesity in children, often associated with insufficient physical activity, lead to decreased use of the motor system; at the same time the increasing fat deposition contributes to overloading of the skeletal system, and this is a precondition for development of postural defects<sup>5</sup>. Children with body mass above the 95th centile (BMI z-score > +2 SD) far more often present postural defects involving the spine, thoracic cage, as well as lower limbs, and suffer from musculoskeletal pain<sup>6</sup>.

Maciałczyk- Paprocka K. et al. report that postural deficits may affect as many as 74.1% of boys and 85.5% of girls with excessive body mass, and the predominant problems include

1  
2  
3 knock knees and fallen arches<sup>7</sup>. Also, in the last decades there has been an unprecedented  
4 increase in the number of obese children, and the problem is associated with a number  
5 of functional disorders, i.e. pain, joint stiffness, reduced muscle strength, which contribute  
6 to development of poor posture. General rates of obesity among children worldwide are  
7  
8 estimated at the level of 10% and, like in the case of postural deficits, the problem is constantly  
9  
10 growing. The top of the ranking is dominated by the North American countries including the  
11  
12 USA, where the level of overweight and obesity reaches the unprecedented rates of almost 32%.  
13  
14 In Western Europe the rates reach up to 20%, whereas in Central and Eastern Europe they reach  
15  
16 the level of 16%<sup>8-9</sup>. Overweight and obesity occur much more often among children and  
17  
18 teenagers from rural areas, compared to towns and cities, mainly from multi-child families  
19  
20 of low economic status, where the education level of the parents is quite low. The problem  
21  
22 mainly affects population of the developmental age, and so the scale of the phenomenon  
23  
24 is a matter of concern<sup>10</sup>.

25  
26 According to numerous clinical data, a child's body posture is particularly at risk during  
27  
28 the periods of the fastest pace of growth, which mainly include the time corresponding to the  
29  
30 start of school education (6-7 years of life) and the puberty period (12-16 years of life). In view  
31  
32 of the above, research focusing on body posture in school-age children, taking into account  
33  
34 body mass, is of particular importance<sup>11-12</sup>. The aim of the study was to assess  
35  
36 a relationship between Body Mass Index and incidence of abnormalities in selected parameters  
37  
38 measured in the trunk area.

## 39 40 **Material and methods**

41  
42 The study was accepted by the local Bioethical Commission on 28 June 2016 (Consent  
43  
44 No. 2016/06/28). The study does not report on or involve the use of any animals. The  
45  
46 participants were informed about the course of the study. The examinations were conducted  
47  
48 after written consent was received from the directors of schools, parents of children  
49  
50 participating in the project and the children themselves.

### 51 52 *Participants*

53  
54 464 school-age children, from 6 to 16 years of age (234 boys and 230 girls) were  
55  
56 qualified for the study (from June 2016 to March 2018), designed to be conducted in schools in  
57  
58 rural region. Examinations were conducted in nurses' offices in the relevant educational  
59  
60

1  
2  
3 facilities. In order to ensure the reliability of the measurements, all the subjects were examined  
4 in the morning, on an empty stomach, by the same members of a qualified team.

5  
6 The study applied the following inclusion criteria: age from 6-16 years and consent  
7 of the parents and children for the examination. Exclusion criteria: metal implants, electronic  
8 implants, periods in girls, epilepsy, failure to refrain from eating in the morning, lack of consent  
9 of the parents and children.  
10  
11  
12  
13

### 14 ***Body Posture***

15  
16 The study was conducted with the use of Zebris system. At the start, topographic points  
17 were marked on the body of each subject to correspond with: acromion right and left, posterior  
18 iliac spine right and left, anterior iliac spine right and left, iliac crest right and left, the point  
19 where the thoracic spine meets the lumbar spine, Th 12/L1, inferior angle of the scapula right  
20 and left, spinous process of the spine.  
21  
22  
23  
24

25 During the examination the subject, wearing no shoes, was asked to assume a relaxed  
26 standing position, with his/her back to the measurement unit, and did not have with him/her any  
27 devices interfering with the transfer of data (e.g. smartwatch, mobile phone).  
28  
29

30 Following calibration of the horizontal plane, the subject's body posture was examined.  
31 The measurement, performed with an ultrasound pointer, involved registration of the  
32 topographic points marked earlier on the subject's body. The measurements were performed  
33 three times in each subject and the spine line was scanned 9 times (three times in each  
34 examination). The final result was the mean value of the measurements<sup>13</sup>.  
35  
36  
37  
38

39 The following were taken into account in the assessment of the posture:

- 40  
41 - in the sagittal projection: the distance of the right scapula (SDR in mm), the distance of the  
42 left scapula (SDL in mm), the difference in the distance of the scapula (SDD in mm),  
43  
44 - in the frontal projection: the difference in the height of the pelvis on the right side (PHDR  
45 in mm), the difference in the height of the pelvis on the left side (PHDL in mm), the difference  
46 in the height of the right shoulder (SHDR in mm), the difference in the height of the left shoulder  
47 (SHDL in mm), pelvic/shoulder obliquity.  
48  
49  
50  
51  
52

### 53 ***Anthropometric Measurements and Bioelectrical Impedance***

54 Body height was measured with an accuracy up to 0.1 cm, with the use of a portable  
55 stadiometer PORTSTAND 210. Body mass was measured with the analyzer Tanita MC – 780  
56 MA with an accuracy up to 0.1 kg. The examinations were conducted in standard conditions.  
57  
58  
59  
60

During the measurement, each subject was barefoot and dressed in underwear, and was asked to assume upright extended position.

The data acquired during the measurement of body height and mass were used to calculate the body mass index (BMI). The BMI value was examined by reference to the growth chart, taking into account sex and age. Based on the achieved percentile ranking, the BMI status was classified in the following four categories of obesity (BMI  $\geq$  95. percentile), overweight (BMI  $\geq$  85. percentile and  $<$ 95. percentile), normal body mass (BMI  $<$ 85. percentile and  $\geq$  5. percentile), and underweight (BMI  $<$ 5. percentile)<sup>14</sup>.

### Data analysis

Spearman's rank correlation test was applied to assess the correlation between the BMI and the body posture. Differences in the selected parameters between the groups were analysed using Kruskal-Wallis and Mann-Whitney tests. The accepted level of significance was  $\alpha < 0.05$ . All calculations and statistical analyses were performed with the use of STATISTICA ver. 10.0 (StatSoft, Poland).

### Results

The characteristics of the study group are shown in Table 1 and 2. On average the subjects were 11.52 years old (SD=2.99). The mean body height was 152.48cm (SD=17.77) and the mean body mass was 45.39kg (SD=16.81). On average the subjects' body mass index was 18.8kg/m<sup>2</sup> (SD=3.75) (Tab. 1).

Table 1. Characteristics of the study group

|                          | n   | Mean   | Me     | SD    | Q <sub>1</sub> | Q <sub>3</sub> |
|--------------------------|-----|--------|--------|-------|----------------|----------------|
| <b>All</b>               |     |        |        |       |                |                |
| Age [years]              | 464 | 11.52  | 12.00  | 2.99  | 9.00           | 14.00          |
| Height [cm]              | 464 | 152.48 | 155.50 | 17.77 | 137.00         | 167.00         |
| Weight [kg]              | 464 | 45.39  | 44.75  | 16.81 | 30.40          | 56.45          |
| BMI [kg/m <sup>2</sup> ] | 464 | 18.80  | 18.24  | 3.75  | 16.10          | 20.97          |
| <b>Girls</b>             |     |        |        |       |                |                |
| Age [years]              | 230 | 11.55  | 12     | 2.96  | 9.00           | 14.00          |
| Height [cm]              | 230 | 150.46 | 155    | 15.69 | 136.00         | 163.00         |
| Weight [kg]              | 230 | 43.63  | 44.35  | 15.38 | 29.70          | 54.60          |
| BMI [kg/m <sup>2</sup> ] | 230 | 18.64  | 18.00  | 3.87  | 15.90          | 20.90          |
| <b>Boys</b>              |     |        |        |       |                |                |



|                               |     |        |        |       |        |        |
|-------------------------------|-----|--------|--------|-------|--------|--------|
| <b>Age [years]</b>            | 234 | 11.49  | 12     | 3.02  | 9.00   | 14.00  |
| <b>Height [cm]</b>            | 234 | 154.46 | 156.50 | 19.43 | 138.00 | 172.00 |
| <b>Weight [kg]</b>            | 234 | 47.13  | 45     | 17.97 | 31.80  | 60.00  |
| <b>BMI [kg/m<sup>2</sup>]</b> | 234 | 18.94  | 18.56  | 3.63  | 16.40  | 21.05  |

Me: median; n: number of subjects; Q<sub>1</sub>: first quartile; Q<sub>3</sub>: third quartile SD: standard deviation;

Taking into consideration the age of the study group, statistical significance was identified in the following parameters: pelvis rotation ( $p=0.049$ ), pelvis obliquity ( $p=0.002$ ), pelvis height on the right side ( $p=0.044$ ), pelvis height on the left side ( $p=0.022$ ), shoulder height on the right side ( $p=0.004$ ). A correlation between the age of the subjects and their BMI was found (Tab.2).

Table 2. The assessment of the correlation between the body posture parameters and the age.

| <b>Variables</b>                                       | <b>R</b> | <b>p</b>         |
|--------------------------------------------------------|----------|------------------|
| <b>Pelvic torsion [degree] &amp; Age</b>               | -0,09    | 0,049            |
| <b>Pelvic obliquity [degree] &amp; Age</b>             | -0,14    | <b>0,002</b>     |
| <b>Pelvic/shoulder obliquity [degree] &amp; Age</b>    | 0,00     | 0,929            |
| <b>Scapula distance difference [mm] &amp; Age</b>      | -0,04    | 0,389            |
| <b>Pelvic height difference right [mm] &amp; Age</b>   | 0,09     | <b>0,044</b>     |
| <b>Pelvic height difference left [mm] &amp; Age</b>    | -0,11    | <b>0,022</b>     |
| <b>Shoulder height difference right [mm] &amp; Age</b> | 0,24     | <b>0,004</b>     |
| <b>Shoulder height difference left [mm] &amp; Age</b>  | 0,01     | 0,877            |
| <b>BMI &amp; Age</b>                                   | 0,58     | <b>&lt;0,001</b> |

$p$ : test probability value; R- rang correlation of Sperman.

Based on the BMI percentiles the categorization of the body mass of the study group was performed. Underweight was found in 6.8% of the boys and in 7.4% of the girls. Normal body mass was identified in 72.7 % of the boys and 74.8 % of the girls. Overweight was found

in 11.5% of the boys and in 12.2 % of the girls, and obesity was identified in 9 % of the boys

| Shoulder distance from the frontal plane |     |                               |      |      |       |      |       |
|------------------------------------------|-----|-------------------------------|------|------|-------|------|-------|
| BMI category                             | N   | Mean<br>(SD)<br>(95%CI)       | Me   | Min. | Max.  | Q1   | Q3    |
| Underweight                              | 33  | 4,58<br>(6,07)<br>(3,13-6,02) | 3,00 | 0,00 | 18,00 | 2,00 | 6,00  |
| Normal Body Mass                         | 342 | 6,90<br>(6,13)<br>(6,27-7,53) | 5,50 | 0,00 | 32,00 | 2,00 | 9,00  |
| Overweight                               | 55  | 8,04<br>(6,16)                | 6,00 | 0,00 | 28,00 | 4,00 | 10,00 |

and in 5.7% of the girls (Tab. 3).

Table 3. The body mass category based on BMI depending on the sex

| BMI Category     | Sex                      |        |       |        |       |        |
|------------------|--------------------------|--------|-------|--------|-------|--------|
|                  | Boys                     |        | Girls |        | Total |        |
|                  | n                        | %      | N     | %      | n     | %      |
| Underweight      | 16                       | 6,8%   | 17    | 7,4%   | 33    | 7,1%   |
| Normal body mass | 170                      | 72,7%  | 172   | 74,8%  | 342   | 73,7%  |
| Overweight       | 27                       | 11,5%  | 28    | 12,2%  | 55    | 11,9%  |
| Obesity          | 21                       | 9,0%   | 13    | 5,6%   | 34    | 7,3%   |
| Total            | 234                      | 100,0% | 230   | 100,0% | 464   | 100,0% |
| Significance(p)  | $\chi^2(3)=1,90$ p=0,591 |        |       |        |       |        |

%; percent of subjects; n: number of subjects; p: test probability value;  $\chi^2$ - chi-square Pearson test.

Analyses of the correlations between BMI and the body posture parameters measured in the trunk area showed statistically significant differences in the case of the distance of the scapulae from the corresponding plane. Statistical significance was not observed in the position of the pelvis ( $H=5.33$   $p=0.150$ ), and the BMI index. It was found that greater body mass (higher BMI index) coincided with a larger distance of the scapulae from the frontal plane ( $H=11.47$   $p=0.009$ ). It has been noticed that people with overweight and obesity have incorrect position of the shoulders and pelvis in comparison to people with normal body weight. (Tab. 4).

|                          |          |                |           |             |             |           |           |
|--------------------------|----------|----------------|-----------|-------------|-------------|-----------|-----------|
|                          |          | (6,34-9,73)    |           |             |             |           |           |
| <b>Obesity</b>           | 34       | 9,50           | 7,00      | 0,00        | 41,00       | 4,00      | 10,00     |
|                          |          | (6,10)         |           |             |             |           |           |
|                          |          | (6,44-12,56)   |           |             |             |           |           |
| <b>H=11,47 p=0,009</b>   |          |                |           |             |             |           |           |
| <b>Shoulder position</b> |          |                |           |             |             |           |           |
| <b>BMI category</b>      | <b>N</b> | <b>Mean</b>    | <b>Me</b> | <b>Min.</b> | <b>Max.</b> | <b>Q1</b> | <b>Q3</b> |
|                          |          | <b>(SD)</b>    |           |             |             |           |           |
|                          |          | <b>(95%CI)</b> |           |             |             |           |           |
| <b>Underweight</b>       |          | 6,96           |           |             |             |           |           |
|                          | 33       | (6,90)         | 5,50      | 0,10        | 19,60       | 2,10      | 10,80     |
|                          |          | (4,98-8,93)    |           |             |             |           |           |
| <b>Normal Body Mass</b>  |          | 10,00          |           |             |             |           |           |
|                          | 341      | (6,72)         | 8,00      | 0,10        | 59,80       | 4,10      | 14,60     |
|                          |          | (9,16-10,84)   |           |             |             |           |           |
| <b>Overweight</b>        |          | 10,66          |           |             |             |           |           |
|                          | 55       | (8,45)         | 7,40      | 0,50        | 32,80       | 3,70      | 16,50     |
|                          |          | (8,33-12,99)   |           |             |             |           |           |
| <b>Obesity</b>           |          | 11,04          |           |             |             |           |           |
|                          | 34       | (7,74)         | 9,35      | 0,50        | 39,90       | 5,20      | 15,10     |
|                          |          | (7,99-14,09)   |           |             |             |           |           |
| <b>H=5,43 p=0,143</b>    |          |                |           |             |             |           |           |
| <b>Pelvis position</b>   |          |                |           |             |             |           |           |
| <b>BMI category</b>      | <b>N</b> | <b>Mean</b>    | <b>Me</b> | <b>Min.</b> | <b>Max.</b> | <b>Q1</b> | <b>Q3</b> |
|                          |          | <b>(SD)</b>    |           |             |             |           |           |
|                          |          | <b>(95%CI)</b> |           |             |             |           |           |
| <b>Underweight</b>       |          | 9,27           |           |             |             |           |           |
|                          | 33       | (5,57)         | 7,70      | 0,10        | 23,20       | 3,60      | 12,50     |
|                          |          | (6,83-11,72)   |           |             |             |           |           |
| <b>Normal Body Mass</b>  |          | 7,97           |           |             |             |           |           |
|                          | 342      | (7,90)         | 6,30      | 0,00        | 35,60       | 2,60      | 11,10     |
|                          |          | (7,25-8,68)    |           |             |             |           |           |
| <b>Overweight</b>        |          | 9,96           |           |             |             |           |           |
|                          | 55       | (8,62)         | 7,40      | 0,10        | 37,40       | 4,50      | 14,70     |
|                          |          | (7,67-12,24)   |           |             |             |           |           |
| <b>Obesity</b>           |          | 10,07          |           |             |             |           |           |
|                          | 34       | (8,74)         | 7,50      | 0,20        | 28,80       | 4,70      | 15,90     |
|                          |          | (7,37-12,77)   |           |             |             |           |           |
| <b>H=5,33 p=0,150</b>    |          |                |           |             |             |           |           |

Table 4. The correction between the body mass category, based on BMI and the body posture

H: Kruskal-Wallis test; SD: standard deviation; CI: confidence interval; Max: maximum value; Me: median; Min: minimum value; n: number of subjects; *p*: test probability value; Q1: quartile 25.; Q3: quartile 75.

## Discussion

Start of school education marks the period when a child's posture is very sensitive to changes due to the new co-occurring environmental factors. The adverse risk factors include mainly the long periods when the child remains seated in class and during other school-related activities, wearing a heavy schoolbag, asymmetry of schoolbag straps, or asymmetric position of schoolbag worn by the child, as well as more frequently occurring fatigue and stressful experiences at school; all these may promote different postural habits involving more pronounced thoracic kyphosis and downward head positioning<sup>15-16</sup>. As a result, natural physical activity is restricted to a degree, and children tend to spend their free time in a passive way, in front of a computer or TV. This situation produces adverse effects because sedentary lifestyle not only increases the risk of excessive body mass in the children but also contributes to the development of postural deficits.

The time when a child attends school may produce beneficial effects as it is likely to foster development of habits related to physical activity and sport, of extreme importance for ensuring child's normal physical development<sup>17-18</sup>. This is equally important to enable early diagnosis, since body posture in adults to a large degree is a result of early stages of development<sup>19-20</sup>. It should be emphasised that early and non-invasive body posture studies

1  
2  
3 among school age children, with the use of the external diagnostic systems, are crucially  
4 important.  
5

6 The current study enabled assessment of body posture parameters in relation to the body  
7 mass index category identified in children going to primary and middle schools. In the study  
8 group underweight was identified in 6.8% of the boys and in 7.4% of the girls. Normal body  
9 mass was found in 72.7% of the boys and 74.8% of the girls. Overweight was identified  
10 in 11.5% of the boys and in 12.2% of the girls. Obesity was found in 9% of the boys and in  
11 5.7% of the girls. These values are similar to the data published by the WHO, according to  
12 which in 2016 overweight and obesity were found in 18% of children and adolescents between  
13 5 and 19 years of age<sup>21</sup>.  
14

15 The current study shows a strong correlation between the BMI and the body posture  
16 parameters. Also a correlation was found between the height of the left shoulder and excessive  
17 weight. Children with higher BMI were far more often found with decreased distance between  
18 the scapula and the frontal plane.  
19

20 A study by Batistão et al., involving 288 school age children, reported asymmetry in the  
21 position of shoulders in 74.3% of the subjects; the problem was particularly pronounced among  
22 older children, aged 13-15, which supports the claim that this type of deficit may be associated  
23 with the rapid growth of specific segments of the body occurring during puberty. In fact the  
24 problem appears to be more closely related to age than to body mass. These asymmetries in the  
25 position of shoulders may also be explained by varied overloads of the body linked with  
26 environmental factors, i.e. asymmetrical body posture in sitting position and carrying of  
27 schoolbags on one side, a habit frequently observed in teenagers<sup>22</sup>. As it is shown by the present  
28 study, incorrect body mass may also be a contributing factor, producing similar effects.  
29

30 Many authors have discussed the relation of body posture and BMI. An important  
31 problem was pointed out by Pausić and others as well as Barszczyk and others who claim, that  
32 both excessively low and excessively high body mass lead to negative changes in the position  
33 of the spine, lower extremities, as well as feet<sup>23-24</sup>. Partly similar results were reported by  
34 Walicka- Cupryś et al. These authors examined children with genu valgum and found that the  
35 defect was most common in overweight children (28.6%), followed by children with normal  
36 weight (14.7%), and it was least frequent in underweight subjects (10.7 %)<sup>25</sup>.  
37

38 Bogucka and others in their study examined body posture of 227 school age children.  
39 The authors observed that in the subgroup of underweight girls, the protruding scapulae were  
40 present significantly more often than in the peers with the normal weight and height. However,  
41 underweight boys more frequently than their peers with normal BMI were characterized by the  
42

1  
2  
3 asymmetry of the scapulae towards the spine. It was suggested that faulty body postures in the  
4 scapulae area occurred more frequently in underweight subjects ( $r = 0.359$ ;  $p < 0.001$ )<sup>26</sup>.

5  
6 Likewise, Grivas et al. reported that excessively low BMI is more frequently associated  
7 with body asymmetry in teenagers<sup>27</sup>. Similar conclusions can be drawn from the study  
8 by Grabara et. Al<sup>28</sup>. The present study identified an opposite tendency. Children with greater  
9 body mass (overweight and obesity) were found with larger distance between the scapulae and  
10 the frontal plane ( $H=11.47$   $p=0.009$ ). However, all the above findings suggest that height and  
11 weight related abnormalities are closely linked with postural defects during developmental age.  
12  
13

14  
15 People with overweight and obesity show higher abnormalities in the position of the  
16 shoulders and pelvis than people with normal weight. Age-related analysis of the study group  
17 showed a negative correlation between the subjects' age and oblique position of the pelvis  
18 ( $r=0.09$ ,  $p=0.049$ ). Similarly, Rosa et al. reported low rates of incorrect pelvis position in grade  
19 I-III children. No related abnormalities were identified in 68% of the girls and 72% of the  
20 boys<sup>29</sup>. Different findings were reported by Słoń, who performed similar measurements in a  
21 group of 162 primary school students (grades IV-VI) in Warsaw. The author observed incorrect  
22 position of the pelvis in 77% of the subjects<sup>30</sup>.  
23  
24  
25  
26  
27  
28  
29

30  
31 The current study enabled assessment of BMI in relation to the incidence of  
32 abnormalities in selected parameters measured in the trunk area. In the literature we can find  
33 data related to the growing number of children and teenagers with excessive body weight,  
34 as well as more and more evidence proving adverse health related effects of overweight and  
35 obesity. Excessive body weight to a large extent contributes to postural defects, and adversely  
36 affects health condition, as well as body water and electrolyte balance. That is why it was  
37 justifiable to specify the body mass category based on BMI and to investigate its influence on  
38 the body posture in school-age children. In view of the fact that obesity is more and more  
39 common among children, schools should provide instruction on healthy diet and encourage  
40 students to take up physical activity.  
41  
42  
43  
44  
45  
46  
47

## 48 **Conclusions**

49  
50 Bad postures in children are linked with their body mass category. With the occurrence  
51 of overweight and obesity, the body posture of the children is incorrect within the trunk.  
52 Therefore, overweight and obesity among children and adolescents should be prevented by  
53 introducing educational programs for whole families and showing them the negative impact  
54 of obesity on body posture.  
55  
56  
57  
58  
59  
60

## References

1. Mrozkowiak M, Walicka- Cupryś K, Magoń G. Comparison of Spinal Curvatures in the Sagittal Plane, as Well as Body Height and Mass in Polish Children and Adolescents examined in the Late 1950s and in the Early 2000s. *Med Sci Monit.* 2018;**24**:4489-4500, <https://doi.org/10.12659/MSM.907134>
2. Araújo FA, Lucas R, Simpkin AJ, *et al.* Associations of anthropometry since birth with sagittal posture at age 7 in a prospective birth cohort: the Generation XXI Study. *BMJ Open.* 2017;**7**: e013412, <https://doi.org/10.1136/bmjopen-2016-013412>.
3. Kowalski IM, Protasiewicz-Faldowska H, Siwik P, *et al.* Analysis of the sagittal plane in standing and sitting position in girls with left lumbar idiopathic scoliosis. *Pol Ann Med.* 2013;**1**:30–34, <https://doi.org/10.1016/j.poamed.2013.07.001>.
4. Komro KA, Tobler AL, Delisle AL, *et al.* Beyond the clinic: improving child health through evidence-based community development. *BMC Pediatr.* 2013;**13**, 172, <https://doi.org/10.1186/1471-2431-13-172>.
5. Barańska E, Gajewska E, Sobieska M. Obesity and the resulting motor organ problems versus motoric fitness in girls and boys with overweight and obesity. *Medical News.* 2012;**4**: 337–341.
6. Smith SM, Sumar B, Dixon KA. Musculoskeletal pain in overweight and obese children. *Int J Obes (Lond).* 2014; **1**:11-15, <https://doi.org/10.1038/ijo.2013.187>.
7. Maciałczyk-Paprocka K, Stawińska-Witoszyńska B, Kotwicki T, *et al.* Prevalence of incorrect body posture in children and adolescents with overweight and obesity. *Eur J Pediatr.* 2017; **5**: 563-572, <https://doi.org/10.1007/s00431-017-2873-4>.
8. 10 facts on obesity, World Health Organization. <http://www.who.int/features/factfiles/obesity/en/> 2018 (accessed 2 May 2018).
9. Hruby A, Hu FB. The Epidemiology of Obesity: A Big Picture. *Pharmacoeconomics.* 2015;**7**: 673–689, <https://doi.org/10.1007/s40273-014-0243-x>.
10. Mazur A, The epidemiology of childhood overweight and obesity on the World, in Europe and in Poland. *Prz. Med. Uniw. Rzesz. Inst. Leków.* 2011;**2**: 158-163.
11. Villarrasa-Sapiña I, Álvarez-Pitti J, Cabeza-Ruiz R, *et al.* Relationship between body composition and postural control in prepubertal overweight/obese children: A cross-sectional study. *Clin Biomech (Bristol, Avon).* 2017; **52**: 1-6, <https://doi.org/10.1016/j.clinbiomech.2017>.
12. Wszyńska J, Podgórska-Bednarz J, Drzał-Grabiec J, *et al.* Analysis of Relationship between the Body Mass Composition and Physical Activity with Body Posture in

- 1  
2  
3 Children. *BioMed Res Int.* 2016; Article ID 1851670: 10 pages,  
4 <https://doi.org/10.1155/2016/1851670>.  
5  
6  
7 13. Rusek W, Pop T, Glista J, *et al.* Assessment of student's body posture with the use of  
8 Zebris system. *Prz. Med. Uniw. Rzesz. Inst. Leków.* 2010; **3**: 277-288.  
9  
10 14. Barlow SE. Expert Committee, Expert committee recommendations regarding the  
11 prevention, assessment, and treatment of child and adolescent overweight and obesity:  
12 summary report. *Pediatrics.* 2007; **120**: 164-192, [https://doi.org/10.1542/peds.2007-](https://doi.org/10.1542/peds.2007-2329C)  
13 [2329C](https://doi.org/10.1542/peds.2007-2329C).  
14  
15 15. Walicka-Cupryś K, Piwoński P, Rachwał M, *et al.* Shape of sagittal plane spinal  
16 curvatures in prematurely born children at the start of school education. *J Novel*  
17 *Physiotherapies.* 2017; **5**: 49.  
18  
19 16. Brzęk A, Dworak T, Strauss M, *et al.* The weight of pupils' schoolbags in early school  
20 age and its influence on body posture. *BMC Musculoskel Dis.* 2017;**18**:117,  
21 <https://doi.org/10.1186/s12891-017-1462-z>.  
22  
23 17. Villarrasa-Sapiña I, García-Massó X, Serra-Añó P, *et al.* Differences in intermittent  
24 postural control between normal-weight and obese children. *Gait Posture.* 2016;**49**: 1-  
25 6. <https://doi.org/10.1016/j.gaitpost.2016.06.012>.  
26  
27 18. Maciańczyk-Paprocka M, Krzyżaniak A, Kotwicki T, *et al.* Postural defects in primary  
28 school students in Poznan. *Probl Hig Epidemiol.* 2012;**2**: 309-314.  
29  
30 19. Kapo S, Rađo I, Smajlović N, *et al.* Increasing Postural Deformity Trends and Body  
31 Mass Index Analysis in School-age Children. *Zdravstveno varstvo.* 2018; **1**:25-32,  
32 <https://doi.org/10.2478/sjph-2018-0004>.  
33  
34 20. Walicka-Cupryś K, Skalska-Izdebska R, Rachwał M, *et al.* Influence of the Weight of  
35 a School Backpack on Spinal Curvature in the Sagittal Plane of Seven-Year-Old  
36 Children. *BioMed Res Int.* 2015; Article ID 817913: 6 pages.  
37 <https://doi.org/10.1155/2015/817913>.  
38  
39 21. Global Health Observatory (GHO) data. [www.who.int](http://www.who.int) (accessed 7 August 2018).  
40  
41 22. Batistão MV, de Fátima Carreira Moreira R, Cote Gil Coury HJ, *et al.* Prevalence of  
42 postural deviations and associated factors in children and adolescents: a cross-sectional  
43 study. *Fisioter. Mov.* 2016;**4**: 778-785, [https://doi.org/10.1590/1980-](https://doi.org/10.1590/1980-5918.029.004.a014)  
44 [5918.029.004.a014](https://doi.org/10.1590/1980-5918.029.004.a014).  
45  
46 23. Barszczyk K, Skolimowski T, Anwajer J, *et al.* Somatic features and parameters of  
47 anterior posterior spinal curvature in 7 years old with particular posture types. *Ortop.*  
48 *Traumatol. Rehabil.* 2005;**5**: 555-562.  
49  
50  
51  
52  
53  
54  
55  
56  
57  
58  
59  
60



- 1  
2  
3 24. Pausić J, Cavala M, Katić R. Relations of the morphological characteristic latent  
4 structure and body posture indicators in children ages seven to nine years. *Coll.*  
5 *Antropol.* 2006;**3**: 621-627.  
6  
7  
8 25. Walicka- Cupryś K, Skalska-Izdebska R, Drzał-Grabiec J, *et al.* Correlation between  
9 body posture and postural stability of school children. *Advances in Rehabilitation.*  
10 2013;**4**: 47-54.  
11  
12 26. Bogucka A, Głębocka A. Body posture of children aged 9 –12 years as related to their  
13 body mass index (BMI). *Physical Activity and Health.* 2017;**12**: 1-17.  
14  
15 27. Grivas TB, Burwell RG, Mihos C, *et al.* Relatively lower body mass index  
16 is associated with an excess of severe truncal asymmetry in healthy adolescents: Do  
17 white adipose tissue, leptin, hypothalamus and sympathetic nervous system influence  
18 truncal growth asymmetry? *Scoliosis.* 2009;**4**: <https://doi.org/10.1186/1748-7161-4-13>.  
19  
20 28. Grabara M, Pstrągowska D. Estimation of the body posture in girls and boys related to  
21 their body mass index (BMI). *Med. Sport.* 2008;**4**; 231-239.  
22  
23 29. Rosa K, Muszkieta R, Zukow W, *et al.* The incidence of defects posture in children  
24 from classes I to III Elementary School. *J Health Sci.* 2013;**3**: 107-136,  
25  
26 30. Słoń A. The incidence of selected postural disorders in children aged 10 –12 years.  
27 WSKFiT. 2015;**10**:49-55.  
28  
29  
30  
31  
32  
33  
34  
35

### Acknowledgement

36 We are grateful to the participants and their families who volunteered their time to participate  
37 in this research.  
38  
39  
40  
41

### Authors' contributions

42 WR- conception and design, revising critically for intellectual content, final approval of the  
43 manuscript, JL- acquisition of data, drafting the article, final approval of the manuscript; JB-  
44 acquisition of data, revising critically for intellectual content, final approval of the manuscript;  
45 MA- analysis and interpretation of data, drafting the article, final approval of the manuscript;  
46 Weres Aneta,- analysis and interpretation of data, drafting the article, final approval of the  
47 manuscript; RB- acquisition of data, drafting the article, final approval of the manuscript, GI-  
48 acquisition of data, revising critically for intellectual content, final approval of the manuscript;  
49 ECL- acquisition of data, revising critically for intellectual content, final approval of the  
50 manuscript, SP- acquisition of data, drafting the article, final approval of the manuscript; TP  
51  
52  
53  
54  
55  
56  
57  
58  
59  
60

1  
2  
3 conception and design, revising critically for intellectual content, final approval of the  
4 manuscript.  
5

### 6 **Funding**

7  
8 This research received no specific grant from any funding agency in the public, commercial or  
9 not-for-profit sectors.  
10

### 11 **Conflicts of interest**

12  
13 The authors declare no conflict of interest.  
14  
15

### 16 **Data sharing statement**

17  
18 The datasets generated and/or analysed during the current study are not publicly available due  
19 to protect the students' privacy, but are available from the corresponding author on reasonable  
20 request.  
21  
22  
23  
24  
25  
26  
27  
28  
29  
30  
31  
32  
33  
34  
35  
36  
37  
38  
39  
40  
41  
42  
43  
44  
45  
46  
47  
48  
49  
50  
51  
52  
53  
54  
55  
56  
57  
58  
59  
60

# Reporting checklist for qualitative study.

Based on the SRQR guidelines.

## Instructions to authors

Complete this checklist by entering the page numbers from your manuscript where readers will find each of the items listed below.

Your article may not currently address all the items on the checklist. Please modify your text to include the missing information. If you are certain that an item does not apply, please write "n/a" and provide a short explanation.

Upload your completed checklist as an extra file when you submit to a journal.

In your methods section, say that you used the SRQR reporting guidelines, and cite them as:

O'Brien BC, Harris IB, Beckman TJ, Reed DA, Cook DA. Standards for reporting qualitative research: a synthesis of recommendations. *Acad Med.* 2014;89(9):1245-1251.

|                                            | Reporting Item                                                                                                                                                                                                                                                                                                                                                                                                                                                                                                                                                                                                                          | Page Number |
|--------------------------------------------|-----------------------------------------------------------------------------------------------------------------------------------------------------------------------------------------------------------------------------------------------------------------------------------------------------------------------------------------------------------------------------------------------------------------------------------------------------------------------------------------------------------------------------------------------------------------------------------------------------------------------------------------|-------------|
|                                            | #1 Concise description of the nature and topic of the study identifying the study as qualitative or indicating the approach (e.g. ethnography, grounded theory) or data collection methods (e.g. interview, focus group) is recommended                                                                                                                                                                                                                                                                                                                                                                                                 | 1           |
|                                            | #2 Summary of the key elements of the study using the abstract format of the intended publication; typically includes background, purpose, methods, results and conclusions                                                                                                                                                                                                                                                                                                                                                                                                                                                             | 2           |
| Problem formulation                        | #3 Description and significance of the problem / phenomenon studied: review of relevant theory and empirical work; problem statement                                                                                                                                                                                                                                                                                                                                                                                                                                                                                                    | 3-4         |
| Purpose or research question               | #4 Purpose of the study and specific objectives or questions                                                                                                                                                                                                                                                                                                                                                                                                                                                                                                                                                                            | 4           |
| Qualitative approach and research paradigm | #5 Qualitative approach (e.g. ethnography, grounded theory, case study, phenomenology, narrative research) and guiding theory if appropriate; identifying the research paradigm (e.g. postpositivist, constructivist / interpretivist) is also recommended; rationale. The rationale should briefly discuss the justification for choosing that theory, approach, method or technique rather than other options available; the assumptions and limitations implicit in those choices and how those choices influence study conclusions and transferability. As appropriate the rationale for several items might be discussed together. | 4-6         |
| Researcher characteristics and reflexivity | #6 Researchers' characteristics that may influence the research, including personal attributes, qualifications / experience, relationship with participants, assumptions and / or presuppositions; potential or actual interaction between researchers' characteristics and the research questions, approach, methods, results and / or transferability                                                                                                                                                                                                                                                                                 | 4-6         |

|    |                                                                                                     |     |                                                                                                                                                                                                                                                                                                                 |       |
|----|-----------------------------------------------------------------------------------------------------|-----|-----------------------------------------------------------------------------------------------------------------------------------------------------------------------------------------------------------------------------------------------------------------------------------------------------------------|-------|
| 1  | <i>Context</i>                                                                                      | #7  | <i>Setting / site and salient contextual factors; rationale</i>                                                                                                                                                                                                                                                 | 4-6   |
| 2  |                                                                                                     |     |                                                                                                                                                                                                                                                                                                                 |       |
| 3  | <i>Sampling strategy</i>                                                                            | #8  | <i>How and why research participants, documents, or events were selected; criteria for deciding when no further sampling was necessary (e.g. sampling saturation); rationale</i>                                                                                                                                | 4-5   |
| 4  |                                                                                                     |     |                                                                                                                                                                                                                                                                                                                 |       |
| 5  |                                                                                                     |     |                                                                                                                                                                                                                                                                                                                 |       |
| 6  |                                                                                                     |     |                                                                                                                                                                                                                                                                                                                 |       |
| 7  |                                                                                                     |     |                                                                                                                                                                                                                                                                                                                 |       |
| 8  | <i>Ethical issues pertaining to human subjects</i>                                                  | #9  | <i>Documentation of approval by an appropriate ethics review board and participant consent, or explanation for lack thereof; other confidentiality and data security issues</i>                                                                                                                                 | 4     |
| 9  |                                                                                                     |     |                                                                                                                                                                                                                                                                                                                 |       |
| 10 |                                                                                                     |     |                                                                                                                                                                                                                                                                                                                 |       |
| 11 | <i>Data collection methods</i>                                                                      | #10 | <i>Types of data collected; details of data collection procedures including (as appropriate) start and stop dates of data collection and analysis, iterative process, triangulation of sources / methods, and modification of procedures in response to evolving study findings; rationale</i>                  | n/a   |
| 12 |                                                                                                     |     |                                                                                                                                                                                                                                                                                                                 |       |
| 13 |                                                                                                     |     |                                                                                                                                                                                                                                                                                                                 |       |
| 14 |                                                                                                     |     |                                                                                                                                                                                                                                                                                                                 |       |
| 15 |                                                                                                     |     |                                                                                                                                                                                                                                                                                                                 |       |
| 16 |                                                                                                     |     |                                                                                                                                                                                                                                                                                                                 |       |
| 17 | <i>Data collection instruments and technologies</i>                                                 | #11 | <i>Description of instruments (e.g. interview guides, questionnaires) and devices (e.g. audio recorders) used for data collection; if / how the instruments(s) changed over the course of the study</i>                                                                                                         | 4     |
| 18 |                                                                                                     |     |                                                                                                                                                                                                                                                                                                                 |       |
| 19 |                                                                                                     |     |                                                                                                                                                                                                                                                                                                                 |       |
| 20 |                                                                                                     |     |                                                                                                                                                                                                                                                                                                                 |       |
| 21 |                                                                                                     |     |                                                                                                                                                                                                                                                                                                                 |       |
| 22 | <i>Units of study</i>                                                                               | #12 | <i>Number and relevant characteristics of participants, documents, or events included in the study; level of participation (could be reported in results)</i>                                                                                                                                                   | 4-5   |
| 23 |                                                                                                     |     |                                                                                                                                                                                                                                                                                                                 |       |
| 24 |                                                                                                     |     |                                                                                                                                                                                                                                                                                                                 |       |
| 25 | <i>Data processing</i>                                                                              | #13 | <i>Methods for processing data prior to and during analysis, including transcription, data entry, data management and security, verification of data integrity, data coding, and anonymisation / deidentification of excerpts</i>                                                                               | 6     |
| 26 |                                                                                                     |     |                                                                                                                                                                                                                                                                                                                 |       |
| 27 |                                                                                                     |     |                                                                                                                                                                                                                                                                                                                 |       |
| 28 |                                                                                                     |     |                                                                                                                                                                                                                                                                                                                 |       |
| 29 |                                                                                                     |     |                                                                                                                                                                                                                                                                                                                 |       |
| 30 | <i>Data analysis</i>                                                                                | #14 | <i>Process by which inferences, themes, etc. were identified and developed, including the researchers involved in data analysis; usually references a specific paradigm or approach; rationale</i>                                                                                                              | 6     |
| 31 |                                                                                                     |     |                                                                                                                                                                                                                                                                                                                 |       |
| 32 |                                                                                                     |     |                                                                                                                                                                                                                                                                                                                 |       |
| 33 |                                                                                                     |     |                                                                                                                                                                                                                                                                                                                 |       |
| 34 |                                                                                                     |     |                                                                                                                                                                                                                                                                                                                 |       |
| 35 | <i>Techniques to enhance trustworthiness</i>                                                        | #15 | <i>Techniques to enhance trustworthiness and credibility of data analysis (e.g. member checking, audit trail, triangulation); rationale</i>                                                                                                                                                                     | n/a   |
| 36 |                                                                                                     |     |                                                                                                                                                                                                                                                                                                                 |       |
| 37 |                                                                                                     |     |                                                                                                                                                                                                                                                                                                                 |       |
| 38 | <i>Syntheses and interpretation</i>                                                                 | #16 | <i>Main findings (e.g. interpretations, inferences, and themes); might include development of a theory or model, or integration with prior research or theory</i>                                                                                                                                               | 6-10  |
| 39 |                                                                                                     |     |                                                                                                                                                                                                                                                                                                                 |       |
| 40 |                                                                                                     |     |                                                                                                                                                                                                                                                                                                                 |       |
| 41 |                                                                                                     |     |                                                                                                                                                                                                                                                                                                                 |       |
| 42 | <i>Links to empirical data</i>                                                                      | #17 | <i>Evidence (e.g. quotes, field notes, text excerpts, photographs) to substantiate analytic findings</i>                                                                                                                                                                                                        | n/a   |
| 43 |                                                                                                     |     |                                                                                                                                                                                                                                                                                                                 |       |
| 44 |                                                                                                     |     |                                                                                                                                                                                                                                                                                                                 |       |
| 45 | <i>Intergration with prior work, implications, transferability and contribution(s) to the field</i> | #18 | <i>Short summary of main findings; explanation of how findings and conclusions connect to, support, elaborate on, or challenge conclusions of earlier scholarship; discussion of scope of application / generalizability; identification of unique contributions(s) to scholarship in a discipline or field</i> | 10-12 |
| 46 |                                                                                                     |     |                                                                                                                                                                                                                                                                                                                 |       |
| 47 |                                                                                                     |     |                                                                                                                                                                                                                                                                                                                 |       |
| 48 |                                                                                                     |     |                                                                                                                                                                                                                                                                                                                 |       |
| 49 |                                                                                                     |     |                                                                                                                                                                                                                                                                                                                 |       |
| 50 |                                                                                                     |     |                                                                                                                                                                                                                                                                                                                 |       |
| 51 | <i>Limitations</i>                                                                                  | #19 | <i>Trustworthiness and limitations of findings</i>                                                                                                                                                                                                                                                              | 3     |
| 52 |                                                                                                     |     |                                                                                                                                                                                                                                                                                                                 |       |
| 53 | <i>Conflicts of interest</i>                                                                        | #20 | <i>Potential sources of influence of perceived influence on study conduct and conclusions; how these were managed</i>                                                                                                                                                                                           | 16    |
| 54 |                                                                                                     |     |                                                                                                                                                                                                                                                                                                                 |       |
| 55 |                                                                                                     |     |                                                                                                                                                                                                                                                                                                                 |       |
| 56 |                                                                                                     |     |                                                                                                                                                                                                                                                                                                                 |       |
| 57 | <i>Funding</i>                                                                                      | #21 | <i>Sources of funding and other support; role of funders in data collection, interpretation and reporting</i>                                                                                                                                                                                                   | 16    |
| 58 |                                                                                                     |     |                                                                                                                                                                                                                                                                                                                 |       |
| 59 |                                                                                                     |     |                                                                                                                                                                                                                                                                                                                 |       |
| 60 |                                                                                                     |     |                                                                                                                                                                                                                                                                                                                 |       |

The SRQR checklist is distributed with permission of Wolters Kluwer © 2014 by the Association of American Medical Colleges. This checklist was completed on 22. March 2019 using <https://www.goodreports.org/>, a tool made by the [EQUATOR Network](#) in collaboration with [Penelope.ai](#)

1  
2  
3  
4  
5  
6  
7  
8  
9  
10  
11  
12  
13  
14  
15  
16  
17  
18  
19  
20  
21  
22  
23  
24  
25  
26  
27  
28  
29  
30  
31  
32  
33  
34  
35  
36  
37  
38  
39  
40  
41  
42  
43  
44  
45  
46  
47  
48  
49  
50  
51  
52  
53  
54  
55  
56  
57  
58  
59  
60

For peer review only

# BMJ Open

## The role of body mass category in the development of faulty postures in school age children from rural areas- cross-sectional study

|                                 |                                                                                                                                                                                                                                                                                                                                                                                                                                                                                                                                                                                                                                                                                                                                                                                        |
|---------------------------------|----------------------------------------------------------------------------------------------------------------------------------------------------------------------------------------------------------------------------------------------------------------------------------------------------------------------------------------------------------------------------------------------------------------------------------------------------------------------------------------------------------------------------------------------------------------------------------------------------------------------------------------------------------------------------------------------------------------------------------------------------------------------------------------|
| Journal:                        | <i>BMJ Open</i>                                                                                                                                                                                                                                                                                                                                                                                                                                                                                                                                                                                                                                                                                                                                                                        |
| Manuscript ID                   | bmjopen-2019-030610.R1                                                                                                                                                                                                                                                                                                                                                                                                                                                                                                                                                                                                                                                                                                                                                                 |
| Article Type:                   | Original research                                                                                                                                                                                                                                                                                                                                                                                                                                                                                                                                                                                                                                                                                                                                                                      |
| Date Submitted by the Author:   | 27-Jun-2019                                                                                                                                                                                                                                                                                                                                                                                                                                                                                                                                                                                                                                                                                                                                                                            |
| Complete List of Authors:       | Rusek, Wojciech; Rehabilitation Centre REHAMED-CENTER, Tajęcina 66a, 36- 002 Tajęcina, Poland<br>Leszczak, Justyna; University of Rzeszow, Faculty of Medicine, Institute of Physiotherapy,<br>Baran, Joanna; Medical Faculty<br>Adamczyk, Marzena; RehaKlinika, 35-959 Rzeszów, Poland<br>Weres, Aneta; University of Rzeszow, Faculty of Medicine, Institute of Physiotherapy<br>Baran, Rafał; Rehabilitation Centre REHAMED-CENTER<br>Inglot, Grzegorz; Clinical Provincial Hospital No. 2, ul. Lwowska 60, 35-301 Rzeszów, Poland<br>Czenczek-Lewandowska, Ewelina; University of Rzeszow, Faculty of Medicine, Institute of Physiotherapy<br>Porada, Sławomir; Trzebownisko Commune Office<br>Pop, Teresa; University of Rzeszow, Faculty of Medicine, Institute of Physiotherapy |
| <b>Primary Subject Heading</b>: | Public health                                                                                                                                                                                                                                                                                                                                                                                                                                                                                                                                                                                                                                                                                                                                                                          |
| Secondary Subject Heading:      | Public health                                                                                                                                                                                                                                                                                                                                                                                                                                                                                                                                                                                                                                                                                                                                                                          |
| Keywords:                       | posture, body mass index, child, rural population                                                                                                                                                                                                                                                                                                                                                                                                                                                                                                                                                                                                                                                                                                                                      |
|                                 |                                                                                                                                                                                                                                                                                                                                                                                                                                                                                                                                                                                                                                                                                                                                                                                        |

SCHOLARONE™  
Manuscripts

1  
2  
3 **The role of body mass category in the development of faulty postures in school age**  
4 **children from rural area- cross-sectional study**  
5  
6  
7

8 Wojciech Rusek<sup>1</sup>, Justyna Leszczak<sup>1,2</sup>, Joanna Baran<sup>1,2</sup>, Marzena Adamczyk<sup>1,3</sup>, Aneta  
9 Weres<sup>2</sup>, Rafał Baran<sup>1</sup>, Grzegorz Ingot<sup>4</sup>, Ewelina Czenczek-Lewandowska<sup>2</sup>, Sławomir  
10 Porada<sup>5</sup>, Teresa Pop<sup>2</sup>  
11  
12  
13  
14

15 1. Rehabilitation Centre REHAMED-CENTER, Tajęcina 66a, 36- 002 Tajęcina, Poland

16 2. University of Rzeszow, Faculty of Medicine, Institute of Physiotherapy, Institute of Physiotherapy,  
17 Medical Faculty, University of Rzeszów Ul. Kopisto 2a, 35-959, Rzeszów, Poland

18 3. RehaKlinika, 35-959 Rzeszów, Poland

19 4. Clinical Provincial Hospital No. 2, ul. Lwowska 60, 35- 301 Rzeszów, Poland

20 5. Trzebownisko Commune Office, 36-001 Trzebownisko 976  
21  
22  
23  
24  
25  
26  
27  
28

29 **Corresponding Author**

30 Justyna Leszczak, Ph.D.

31 Email address: leszczakjustyna.ur@gmail.com

32 Institute of Physiotherapy, Medical Faculty, University of Rzeszów

33 Ul. Kopisto 2a

34 35-959, Rzeszów, Poland

35 ORCID: 0000-0001-8769-0048  
36  
37  
38  
39  
40  
41  
42  
43  
44  
45  
46  
47  
48  
49  
50  
51  
52  
53  
54  
55  
56  
57  
58  
59  
60

**Word count: 3548**

## Abstract

**Objective.** The aim of the study was to assess a relationship between Body Mass Index and incidence of abnormalities in selected parameters measured in the trunk area.

**Design.** Cross-sectional studies.

**Setting.** The research was conducted in a primary school in the rural area.

**Participants.** A group of 464 children, ranging in age from 6 to 16 years (234 boys and 230 girls), was recruited to participate in the study.

**Outcome Measures.** The examination of their body postures was conducted with the use of Zebris system. Body mass was determined using a body mass analyser Tanita MC – 780 MA. Body mass index (BMI) was calculated based on the acquired data.

**Results.** It has been noticed that children with overweight and obesity have incorrect position of the shoulders and pelvis in comparison to children with normal body weight. It was found that greater body mass (higher BMI index) coincided with a larger distance of the scapulae from the frontal plane ( $p=0.009$ ).

**Conclusions.** Increase in children's BMI produces adverse effects in the position of shoulder blades, reflected by their greater distance from the frontal plane. Increase in BMI is not significantly related to the position of shoulder joints or pelvis, however the subjects with overweight or obesity presented a greater difference in the position of shoulder joints and pelvis.

Key words. Posture, Body Mass Index, Child, Rural Population

### Strengths of this study

- The homogeneity and large size of the study group from rural areas.
- Objective and standardized measuring devices.
- Important and current issue confirming the connection between abnormal weight and incorrect body posture of the school-aged children



## Limitations of this study

- Can not entirely rule out the possibility of unmeasured or unknown confounding factors (parental genetic predisposition to higher BMI) that may account for the associations observed in this study. However, the homogeneity of the study population and comprehensive data on the risk factors minimized potential confounding.
- Other elements which can affect trunk muscle tension include muscular problems, e.g. neonatal hypertonia or hypotonia and their consequences in childhood, as well as past injuries and chronic neurological diseases and these should be taken into account in the future studies.

## Introduction

Child's correct body posture favourably affects the growth of the whole organism <sup>1</sup>. It contributes for instance to the normal development and functioning of body organs, and improves effectiveness of motor activity and general well-being <sup>2</sup>. If they are developed early in life, correct motor habits contribute to normal development of the muscles, joints and ligaments and provide beneficial stimulation to the child's growing skeleton. Even the smallest defects in the body posture of a school-age child can lead to the development of a habitual bad posture and, consequently, to health problems <sup>3-4</sup>.

Body postures are subject to large changeability, which depends on such factors as age, sex, somatic type, ethnicity, environment and psychophysical condition. The major risk factors which may induce development of incorrect body posture include excessive body mass in relation to height and age <sup>5-6</sup>. A vast majority of overweight or obese children live in developing countries with growth rates over 30% higher compared to the developed countries. If the current trends continue, the number of overweight or obese infants worldwide will increase to 70 million in 2025 <sup>7</sup>. Overweight and obesity in children, often associated with insufficient physical activity, lead to decreased use of the motor system; at the same time the increasing fat deposition contributes to overloading of the skeletal system, and this is a precondition for development of postural defects <sup>8</sup>. Children with body mass above the 95th centile (BMI z-score > +2 SD) far more often present postural defects involving the spine, thoracic cage, as well as lower limbs, and suffer from musculoskeletal pain <sup>9</sup>.

Maciałyk- Paprocka K. et al. report that postural deficits may affect as many as 74.1% of boys and 85.5% of girls with excessive body mass, and the predominant problems include knock knees and fallen arches <sup>10</sup>. Also, in the last decades there has been an unprecedented increase in the number of obese children, and the problem is associated with a number

1  
2  
3 of functional disorders, i.e. pain, joint stiffness, reduced muscle strength, which contribute  
4 to development of poor posture. General rates of obesity among children worldwide are  
5 estimated at the level of 10% and, like in the case of postural deficits, the problem is constantly  
6 growing. The top of the ranking is dominated by the North American countries including the  
7 USA, where the level of overweight and obesity reaches the unprecedented rates of almost 32%.  
8 In Western Europe the rates reach up to 20%, whereas in Central and Eastern Europe they reach  
9 the level of 16% <sup>11-12</sup>.

15 According to numerous clinical data, a child's body posture is particularly at risk during  
16 the periods of the fastest pace of growth, which mainly include the time corresponding to the  
17 start of school education (6-7 years of life) and the puberty period (12-16 years of life). In view  
18 of the above, research focusing on body posture in school-age children, taking into account  
19 body mass, is of particular importance <sup>12-14</sup>.

24 According to the data reported in the literature, the rate of overweight and obesity in  
25 children is consistently increasing <sup>15</sup>. A similar situation is observed in the case of postural  
26 defects <sup>16</sup>. In previously conducted studies numerous authors have investigated factors affecting  
27 obesity or postural defects, usually however, focusing on these problems separately <sup>15,17-18</sup>.  
28 There are no studies which would link these two aspects to each other. Additionally, majority  
29 of the reports are related to children from urban areas, more affected by globalisation, and those  
30 from highly developed countries where children more commonly present musculoskeletal  
31 disorders related to incorrect body posture <sup>19-21</sup>. On the other hand, it would be worthwhile to  
32 carry out related research focusing on rural areas where children grow up in more natural  
33 environments, have more opportunities for outdoors activity, and better access to healthy food,  
34 yet they are also frequently affected by the two problems <sup>22-23</sup>. Overweight and obesity occur  
35 much more often among children and teenagers from rural areas, compared to towns and cities,  
36 mainly from multi-child families of low economic status, where the education level of the  
37 parents is quite low. The problem mainly affects population of the developmental age, and so  
38 the scale of the phenomenon is a matter of concern <sup>24</sup>. There is also a scarcity of studies  
39 examining body posture with objective measurement methods, such as Zebris APGMS Pointer,  
40 which performs detailed assessment of static body posture, range of motion and the shape of  
41 spinal curves <sup>10</sup>.

54 The aim of the study was to assess a relationship between Body Mass Index and  
55 abnormalities in the trunk area, i.e. scapula distance difference, pelvic height difference and  
56 shoulder height difference in children living in rural communities.  
57  
58  
59  
60

## Material and methods

The study was accepted by the local Bioethical Commission on 28 June 2016 (Consent No. 2016/06/28). The participants were informed about the course of the study. The examinations were conducted after written consent was received from the directors of schools, parents of children participating in the project and the children themselves.

### *Participants*

Firstly, the sample size was calculated with reference to the total number of children (n=3790) living in the rural area in the relevant region, with a 95% confidence level and a confidence interval of 0.05. It was calculated that the minimum sample size should be 349. The study took into account 464 school-age children, from 6 to 16 years of age (234 boys and 230 girls). They were qualified for the study (from June 2016 to March 2018), designed to be conducted in schools in rural region. Examinations were conducted in nurses' offices in the relevant educational facilities. In order to ensure the reliability of the measurements, all the subjects were examined in the morning, on an empty stomach, by the same members of a qualified team.

The study applied the following inclusion criteria: age from 6-16 years and consent of the parents and children for the examination. Exclusion criteria: metal implants, electronic implants, periods in girls, epilepsy and failure to refrain from eating in the morning at the day of the study. Children with a diagnosis of neonatal hypertonia or hypotonia, chronic neurological diseases or past injuries and surgical interventions during the last 6 months before examination were excluded from the study group.

### *Body Posture*

The study of body posture was conducted with the use of Zebris APGMS Pointer system. An examination is carried out with an ultrasound pointer used to mark characteristic anatomical locations corresponding to specific bone structures on the patient's body. These locations are treated by the software as passive points. Their position and movement are tracked and recorded in real time by the software. The study was carried out in static conditions, in motionless standing position.

The reference markers were three miniature transmitters attached to the patient with flexible straps. These define points, with reference to which the device specifies the positions of pointer markers. By applying the pointer to the characteristic anatomical locations on the

1  
2  
3 body and by activating the device it is possible to visualise the relevant points on the screen and  
4 to create three-dimensional image of the body posture<sup>25-26</sup>.

5  
6 At the start, topographic points were marked on the body of each subject to correspond  
7 with: acromion right and left, posterior iliac spine right and left, anterior iliac spine right and  
8 left, iliac crest right and left, the point where the thoracic spine meets the lumbar spine, Th  
9 12/L1, inferior angle of the scapula right and left, spinous process of the spine. A sample result  
10 of the examination as well as the defined topographic points are shown in Figure 1 (Fig.1).

11  
12 Based on the defined topographic points, the software computes the values of selected  
13 body posture parameters. The following were taken into account in the assessment of the  
14 posture:

- 15  
16 - in the sagittal projection: scapula distance difference (SDD in mm) (Fig.2),  
17  
18 - in the frontal projection: pelvic height difference (PHD in mm) and shoulder height difference  
19 (SHD in mm) (Fig.3).

20  
21 During the examination the subject, wearing no shoes, was asked to assume a relaxed  
22 standing position, with his/her back to the measurement unit, and did not have with him/her any  
23 devices interfering with the transfer of data (e.g. smartwatch, mobile phone).

24  
25 Following calibration of the horizontal plane, the subject's body posture was examined.  
26 The measurement, performed with an ultrasound pointer, involved registration of the  
27 topographic points marked earlier on the subject's body. The measurements were performed  
28 three times in each subject and the spine line was scanned 9 times (three times in each  
29 examination). The final result was the mean value of the measurements<sup>27</sup>.

### 30 31 ***Anthropometric Measurements and Bioelectrical Impedance***

32  
33 Body height was measured with an accuracy up to 0.1 cm, with the use of a portable  
34 stadiometer PORTSTAND 210. Body mass was measured with the analyzer Tanita MC – 780  
35 MA with an accuracy up to 0.1 kg. The examinations were conducted in standard conditions.  
36 During the measurement, each subject was barefoot and dressed in underwear, and was asked  
37 to assume upright extended position.

38  
39 The data acquired during the measurement of body height and mass were used  
40 to calculate the body mass index (BMI). The BMI value was examined by reference to the  
41 growth chart, taking into account sex and age. Based on the achieved percentile ranking, the  
42 BMI status was classified in the following four categories of obesity (BMI  $\geq$  95. percentile),  
43 overweight (BMI  $\geq$  85. percentile and  $<$ 95. percentile), normal body mass (BMI  $<$ 85. percentile  
44 and  $\geq$  5. percentile), and underweight (BMI  $<$ 5. percentile)<sup>28</sup>.

### **Data analysis**

Spearman's rank correlation test was applied to assess the correlation between the BMI and the body posture. Differences in the selected parameters between the groups were analysed using Kruskal-Wallis test. The accepted level of significance was  $\alpha < 0.05$ . All calculations and statistical analyses were performed with the use of STATISTICA ver. 10.0 (StatSoft, Poland).

### **Patient and public involvement**

Patients and public were not involved in the design of the study. The parents of the children participated in the study have received the results of the measurement and recommendations about treatment opportunities.

### **Results**

The characteristics of the study group are shown in Table 1 and 2. On average the subjects were 11.52 years old (SD=2.99). The mean body height was 152.48cm (SD=17.77) and the mean body mass was 45.39kg (SD=16.81). On average the subjects' body mass index was 18.8kg/m<sup>2</sup> (SD=3.75) (Tab. 1).

Table 1. Characteristics of the study group

|                               | <b>N</b> | <b>Mean</b> | <b>Me</b> | <b>SD</b> | <b>Q<sub>1</sub></b> | <b>Q<sub>3</sub></b> |
|-------------------------------|----------|-------------|-----------|-----------|----------------------|----------------------|
| <b>All</b>                    |          |             |           |           |                      |                      |
| <b>Age [years]</b>            | 464      | 11.52       | 12.00     | 2.99      | 9.00                 | 14.00                |
| <b>Height [cm]</b>            | 464      | 152.48      | 155.50    | 17.77     | 137.00               | 167.00               |
| <b>Weight [kg]</b>            | 464      | 45.39       | 44.75     | 16.81     | 30.40                | 56.45                |
| <b>BMI [kg/m<sup>2</sup>]</b> | 464      | 18.80       | 18.24     | 3.75      | 16.10                | 20.97                |
| <b>Girls</b>                  |          |             |           |           |                      |                      |
| <b>Age [years]</b>            | 230      | 11.55       | 12        | 2.96      | 9.00                 | 14.00                |
| <b>Height [cm]</b>            | 230      | 150.46      | 155       | 15.69     | 136.00               | 163.00               |
| <b>Weight [kg]</b>            | 230      | 43.63       | 44.35     | 15.38     | 29.70                | 54.60                |
| <b>BMI [kg/m<sup>2</sup>]</b> | 230      | 18.64       | 18.00     | 3.87      | 15.90                | 20.90                |
| <b>Boys</b>                   |          |             |           |           |                      |                      |
| <b>Age [years]</b>            | 234      | 11.49       | 12        | 3.02      | 9.00                 | 14.00                |
| <b>Height [cm]</b>            | 234      | 154.46      | 156.50    | 19.43     | 138.00               | 172.00               |
| <b>Weight [kg]</b>            | 234      | 47.13       | 45        | 17.97     | 31.80                | 60.00                |
| <b>BMI [kg/m<sup>2</sup>]</b> | 234      | 18.94       | 18.56     | 3.63      | 16.40                | 21.05                |

Me: median; n: number of subjects; Q<sub>1</sub>: first quartile; Q<sub>3</sub>: third quartile SD: standard deviation;

Based on the BMI percentiles the categorization of the body mass of the study group was performed. Underweight was found in 6.8% of the boys and in 7.4% of the girls. Normal body mass was identified in 72.7 % of the boys and 74.8 % of the girls. Overweight was found in 11.5% of the boys and in 12.2 % of the girls, and obesity was identified in 9 % of the boys and in 5.7% of the girls (Tab. 2).

Table 2. The body mass category based on BMI depending on the sex

| BMI Category            | Sex                      |        |       |        |       |        |
|-------------------------|--------------------------|--------|-------|--------|-------|--------|
|                         | Boys                     |        | Girls |        | Total |        |
|                         | N                        | %      | n     | %      | N     | %      |
| <b>Underweight</b>      | 16                       | 6,8%   | 17    | 7,4%   | 33    | 7,1%   |
| <b>Normal body mass</b> | 170                      | 72,7%  | 172   | 74,8%  | 342   | 73,7%  |
| <b>Overweight</b>       | 27                       | 11,5%  | 28    | 12,2%  | 55    | 11,9%  |
| <b>Obesity</b>          | 21                       | 9,0%   | 13    | 5,6%   | 34    | 7,3%   |
| <b>Total</b>            | 234                      | 100,0% | 230   | 100,0% | 464   | 100,0% |
| <b>Significance(p)</b>  | $\chi^2(3)=1,90$ p=0,591 |        |       |        |       |        |

#: percent of subjects; n: number of subjects; p: test probability value;  $\chi^2$ - chi-square Pearson test.

Analyses of the correlations between BMI and the body posture parameters measured in the trunk area showed statistically significant differences in the case of the distance of the scapulae from the corresponding plane. Statistical significance was not observed in the position of the pelvis ( $H=5.33$  p=0.150), and the BMI index. It was found that greater body mass (higher BMI index) coincided with a larger distance of the scapulae from the frontal plane ( $H=11.47$  p=0.009). It has been noticed that people with overweight and obesity have incorrect position of the shoulders and pelvis in comparison to people with normal body weight. (Tab. 3).

Table 3. The correction between the body mass category, based on BMI and the body posture

| Scapula distance difference (SDD in mm) |     |                       |      |      |      |       |      |       |
|-----------------------------------------|-----|-----------------------|------|------|------|-------|------|-------|
| BMI category                            | N   | Mean<br>(95%CI)       | SD   | Me   | Min. | Max.  | Q1   | Q3    |
| Underweight                             | 33  | 4,58<br>(3,13-6,02)   | 6,07 | 3,00 | 0,00 | 18,00 | 2,00 | 6,00  |
| Normal Body<br>Mass                     | 342 | 6,90<br>(6,27-7,53)   | 6,13 | 5,50 | 0,00 | 32,00 | 2,00 | 9,00  |
| Overweight                              | 55  | 8,04<br>(6,34-9,73)   | 6,16 | 6,00 | 0,00 | 28,00 | 4,00 | 10,00 |
| Obesity                                 | 34  | 9,50<br>(6,44-12,56)  | 6,10 | 7,00 | 0,00 | 41,00 | 4,00 | 10,00 |
| H=11,47 p=0,009                         |     |                       |      |      |      |       |      |       |
| Shoulder height difference (SHD in mm)  |     |                       |      |      |      |       |      |       |
| BMI category                            | N   | Mean<br>(95%CI)       | SD   | Me   | Min. | Max.  | Q1   | Q3    |
| Underweight                             | 33  | 6,96<br>(4,98-8,93)   | 6,90 | 5,50 | 0,10 | 19,60 | 2,10 | 10,80 |
| Normal Body<br>Mass                     | 342 | 10,00<br>(9,16-10,84) | 6,72 | 8,00 | 0,10 | 59,80 | 4,10 | 14,60 |
| Overweight                              | 55  | 10,66<br>(8,33-12,99) | 8,45 | 7,40 | 0,50 | 32,80 | 3,70 | 16,50 |
| Obesity                                 | 34  | 11,04<br>(7,99-14,09) | 7,74 | 9,35 | 0,50 | 39,90 | 5,20 | 15,10 |
| H=5,43 p=0,143                          |     |                       |      |      |      |       |      |       |
| Pelvis height difference (PHD in mm)    |     |                       |      |      |      |       |      |       |
| BMI category                            | N   | Mean<br>(95%CI)       | SD   | Me   | Min. | Max.  | Q1   | Q3    |
| Underweight                             | 33  | 9,27<br>(6,83-11,72)  | 5,57 | 7,70 | 0,10 | 23,20 | 3,60 | 12,50 |
| Normal Body<br>Mass                     | 342 | 7,97<br>(7,25-8,68)   | 7,90 | 6,30 | 0,00 | 35,60 | 2,60 | 11,10 |
| Overweight                              | 55  | 9,96<br>(7,67-12,24)  | 8,62 | 7,40 | 0,10 | 37,40 | 4,50 | 14,70 |
| Obesity                                 | 34  | 10,07<br>(7,37-12,77) | 8,74 | 7,50 | 0,20 | 28,80 | 4,70 | 15,90 |
| H=5,33 p=0,150                          |     |                       |      |      |      |       |      |       |

H: Kruskal-Wallis test; SD: standard deviation; CI: confidence interval; Max: maximum value; Me: median; Min: minimum value; n: number of subjects; p: test probability value; Q1: quartile 25.; Q3: quartile 75.

## Discussion

Start of school education marks the period when a child's posture is very sensitive to changes due to the new co-occurring environmental factors. The adverse risk factors include mainly the long periods when the child remains seated in class and during other school-related activities, wearing a heavy schoolbag, asymmetry of schoolbag straps, or asymmetric position of schoolbag worn by the child, as well as more frequently occurring fatigue and stressful experiences at school; all these may promote different postural habits involving more pronounced thoracic kyphosis and downward head positioning<sup>29-30</sup>. As a result, natural physical activity is restricted to a degree, and children tend to spend their free time in a passive way, in front of a computer or TV. This situation produces adverse effects because sedentary lifestyle not only increases the risk of excessive body mass in the children but also contributes to the development of postural deficits.

The time when a child attends school may produce beneficial effects as it is likely to foster development of habits related to physical activity and sport, of extreme importance for ensuring child's normal physical development<sup>31-32</sup>. This is equally important to enable early diagnosis, since body posture in adults to a large degree is a result of early stages of development<sup>33-34</sup>. It should be emphasised that early and non-invasive body posture studies among school age children, with the use of the external diagnostic systems, are crucially important.

The current study enabled assessment of body posture parameters in relation to the body mass index category identified in children going to primary and middle schools. In the study group underweight was identified in 6.8% of the boys and in 7.4% of the girls. Normal body mass was found in 72.7% of the boys and 74.8% of the girls. Overweight was identified in 11.5% of the boys and in 12.2% of the girls. Obesity was found in 9% of the boys and in 5.7% of the girls. These values are similar to the data published by the WHO, according to which in 2016 overweight and obesity were found in 18% of children and adolescents between 5 and 19 years of age<sup>35</sup>.

The current study shows a strong correlation between the BMI and the body posture parameters. Also a correlation was found between the height of the left shoulder and excessive weight. Children with higher BMI were far more often found with decreased distance between the scapula and the frontal plane.

A study by Batista et al., involving 288 school age children, reported asymmetry in the position of shoulders in 74.3% of the subjects; the problem was particularly pronounced among older children, aged 13-15, which supports the claim that this type of deficit may be associated



1  
2  
3 with the rapid growth of specific segments of the body occurring during puberty. In fact the  
4 problem appears to be more closely related to age than to body mass. These asymmetries in the  
5 position of shoulders may also be explained by varied overloads of the body linked with  
6 environmental factors, i.e. asymmetrical body posture in sitting position and carrying of  
7 schoolbags on one side, a habit frequently observed in teenagers<sup>36</sup>. As it is shown by the present  
8 study, incorrect body mass may also be a contributing factor, producing similar effects.  
9

10  
11  
12  
13 Many authors have discussed the relation of body posture and BMI. An important  
14 problem was pointed out by Pausić and others as well as Barszczyk and others who claim, that  
15 both excessively low and excessively high body mass lead to negative changes in the position  
16 of the spine, lower extremities, as well as feet<sup>37-38</sup>. Partly similar results were reported by  
17 Walicka- Cupryś et al. These authors examined children with genu valgum and found that the  
18 defect was most common in overweight children (28.6%), followed by children with normal  
19 weight (14.7%), and it was least frequent in underweight subjects (10.7 %) <sup>25</sup>.

20  
21  
22  
23  
24  
25  
26 Bogucka and others in their study examined body posture of 227 school age children.  
27 The authors observed that in the subgroup of underweight girls, the protruding scapulae were  
28 present significantly more often than in the peers with the normal weight and height. However,  
29 underweight boys more frequently than their peers with normal BMI were characterized by the  
30 asymmetry of the scapulae towards the spine. It was suggested that faulty body postures in the  
31 scapulae area occurred more frequently in underweight subjects ( $r = 0.359$ ;  $p < 0.001$ ) <sup>39</sup>.

32  
33  
34  
35  
36 Likewise, Grivas et al. reported that excessively low BMI is more frequently associated  
37 with body asymmetry in teenagers <sup>40</sup>. Similar conclusions can be drawn from the study  
38 by Grabara et. al <sup>41</sup>. The present study identified an opposite tendency. Children with greater  
39 body mass (overweight and obesity) were found with larger distance between the scapulae and  
40 the frontal plane ( $H=11.47$   $p=0.009$ ). However, all the above findings suggest that height and  
41 weight related abnormalities are closely linked with postural defects during developmental age.  
42

43  
44  
45  
46  
47  
48  
49  
50  
51  
52  
53  
54  
55  
56  
57  
58  
59  
60  
60 People with overweight and obesity show higher abnormalities in the position of the  
shoulders and pelvis than people with normal weight. Age-related analysis of the study group  
showed a negative correlation between the subjects' age and oblique position of the pelvis  
( $r=0.09$ ,  $p=0.049$ ). Similarly, Rosa et al. reported low rates of incorrect pelvis position in grade  
I-III children. No related abnormalities were identified in 68% of the girls and 72% of the boys  
<sup>42</sup>. Different findings were reported by Słoń, who performed similar measurements in a group  
of 162 primary school students (grades IV-VI) in Warsaw. The author observed incorrect  
position of the pelvis in 77% of the subjects <sup>43</sup>.

1  
2  
3 The current study enabled assessment of BMI in relation to the incidence of  
4 abnormalities in selected parameters measured in the trunk area. In the literature we can find  
5 data related to the growing number of children and teenagers with excessive body weight,  
6 as well as more and more evidence proving adverse health related effects of overweight and  
7 obesity. Excessive body weight to a large extent contributes to postural defects, and adversely  
8 affects health condition, as well as body water and electrolyte balance. That is why it was  
9 justifiable to specify the body mass category based on BMI and to investigate its influence on  
10 the body posture in school-age children. In view of the fact that obesity is more and more  
11 common among children, schools should provide instruction on healthy diet and encourage  
12 students to take up physical activity.  
13  
14  
15  
16  
17  
18  
19

20 The results of the examinations made it possible to increase awareness among parents  
21 and primary school teachers related to the important role of body weight in a child's  
22 development, including the effects of this factor in body posture. Following the study,  
23 headmasters of the relevant schools initiated cooperation with a Rehabilitation Centre offering  
24 specialist consultations and optional corrective exercise programs for children with postural  
25 defects. Overweight and obesity among children and adolescents should be prevented by  
26 introducing educational programs for whole families and showing them the negative impact  
27 of obesity on body posture.  
28  
29  
30  
31  
32  
33  
34

### 35 **Conclusions**

36 Increase in children's BMI produces adverse effects in the position of shoulder blades,  
37 reflected by their greater distance from the frontal plane. Increase in BMI is not significantly  
38 related to the position of shoulder joints or pelvis, however the subjects with overweight  
39 or obesity presented a greater difference in the position of shoulder joints and pelvis.  
40  
41  
42  
43  
44

### 45 **References**

- 46 1. Ferguson KT, Cassells RC, MacAllister JW, *et al.* The physical environment and child  
47 development: An international review. *Int J Psychol.* 2013;**48**: 437-468,  
48 <https://doi.org/10.1080/00207594.2013.804190>.
- 49 2. McEvoy MP, Grimmer K. Reliability of upright posture measurements in primary  
50 school children. *BMC Musculoskelet Disord.* .2005;**6**: 35, [https://doi.org/](https://doi.org/10.1186/1471-2474-6-35)  
51 [10.1186/1471-2474-6-35](https://doi.org/10.1186/1471-2474-6-35).
- 52 3. Mrozkowiak M, Walicka-Cupryś K, Magoń G. Comparison of Spinal Curvatures in the  
53 Sagittal Plane, as Well as Body Height and Mass in Polish Children and Adolescents  
54  
55  
56  
57  
58  
59  
60

- 1  
2  
3 examined in the Late 1950s and in the Early 2000s. *Med Sci Monit.* 2018;**24**: 4489-  
4 4500, <https://doi.org/10.12659/MSM.907134>.
- 5  
6 4. Araújo FA, Lucas R, Simpkin AJ, *et al.* Associations of anthropometry since birth with  
7 sagittal posture at age 7 in a prospective birth cohort: the Generation XXI Study. *BMJ*  
8 *Open.* 2017;**7**: e013412, <https://doi.org/10.1136/bmjopen-2016-013412>.  
9
- 10  
11 5. Kowalski IM, Protasiewicz-Faldowska H, Siwik P, *et al.* Analysis of the sagittal plane  
12 in standing and sitting position in girls with left lumbar idiopathic scoliosis. *Pol Ann*  
13 *Med.* 2013;**1**: 30–34, <https://doi.org/10.1016/j.poamed.2013.07.001>.  
14
- 15  
16 6. Komro KA, Tobler AL, Delisle AL, *et al.* Beyond the clinic: improving child health  
17 through evidence-based community development. *BMC Pediatr.* 2013;**13**, 172,  
18 <https://doi.org/10.1186/1471-2431-13-172>.  
19
- 20  
21 7. WHO: Commission on Ending Childhood Obesity. "Facts and figures on childhood  
22 obesity". Last update: 13 October 2017. [https://www.who.int/end-childhood-](https://www.who.int/end-childhood-obesity/facts/en/2019)  
23 [obesity/facts/en/2019](https://www.who.int/end-childhood-obesity/facts/en/2019) ((accessed 14 June 2019).  
24
- 25  
26 8. Barańska E, Gajewska E, Sobieska M. Obesity and the resulting motor organ problems  
27 versus motoric fitness in girls and boys with overweight and obesity. *Medical News.*  
28 2012;**4**: 337–341.  
29
- 30  
31 9. Smith SM, Sumar B, Dixon KA. Musculoskeletal pain in overweight and obese  
32 children. *Int J Obes (Lond).* 2014; 1:11-15, <https://doi.org/10.1038/ijo.2013.187>.  
33
- 34  
35 10. Maciańczyk-Paprocka K, Stawińska-Witoszyńska B, Kotwicki T, *et al.* Prevalence of  
36 incorrect body posture in children and adolescents with overweight and obesity. *Eur J*  
37 *Pediatr.* 2017; **5**: 563-572, <https://doi.org/10.1007/s00431-017-2873-4>.  
38
- 39  
40 11. 10 facts on obesity, World Health Organization.  
41 <http://www.who.int/features/factfiles/obesity/en/2018> (accessed 2 May 2018).  
42
- 43  
44 12. Hruby A, Hu FB. The Epidemiology of Obesity: A Big Picture. *Pharmacoeconomics.*  
45 2015;**7**: 673–689, <https://doi.org/10.1007/s40273-014-0243-x>.  
46
- 47  
48 13. Mazur A, The epidemiology of childhood overweight and obesity on the World, in  
49 Europe and in Poland. *Prz. Med. Uniw. Rzesz. Inst. Leków.* 2011;**2**: 158-163.  
50
- 51  
52 14. Villarrasa-Sapiña I, Álvarez-Pitti J, Cabeza-Ruiz R, *et al.* Relationship between body  
53 composition and postural control in prepubertal overweight/obese children: A cross-  
54 sectional study. *Clin Biomech (Bristol, Avon).* 2017; **52**: 1-6,  
55 <https://doi.org/10.1016/j.clinbiomech.2017>.  
56
- 57  
58 15. NCD Risk Factor Collaboration (NCD-RisC). Worldwide trends in body-mass index,  
59 underweight, overweight, and obesity from 1975 to 2016: a pooled analysis of 2416  
60

- 1  
2  
3 population-based measurement studies in 128·9 million children, adolescents, and  
4 adults. *Lancet*. 2017; **390**: 2627-2642, [https://doi.org/10.1016/S0140-6736\(17\)32129-3](https://doi.org/10.1016/S0140-6736(17)32129-3).
- 5  
6 16. Drzał-Grabiec J, Snela S, Truszczyńska A. The development of anterior-posterior spinal  
7 curvature in children aged 7-12 years. *Biomed Hum Kinet*. 2016;**8**: 72-82,  
8 <https://doi.org/10.1515/bhk-2016-0011>.
- 9  
10  
11 17. Latański M, Bylina J, Fatyga M, *et al*. Risk factors of postural defects in children at  
12 school age. *Ann Agric Environ Med*. 2013;**20**: 583-587.
- 13  
14  
15 18. Dereń K, Nyankovskyy S, Nyankovska O, *et al*. The prevalence of underweight,  
16 overweight and obesity in children and adolescents from Ukraine. *Sci Rep*. 2018;**8**:  
17 3625, <https://doi.org/10.1038/s41598-018-21773-4>.
- 18  
19  
20 19. Paranjape S, Ingole V. Prevalence of Back Pain in Secondary School Students in an  
21 Urban Population: Cross-sectional Study. *Cureus*. 2018;**10**: e2983, <https://doi.org/10.7759/cureus.2983>.
- 22  
23  
24 20. Maciałczyk-Paprocka K, Dudzińska J, Stawińska-Witoszyńska B, *et al*. Incidence of  
25 scoliotic posture in school screening of urban children and adolescents: the case of  
26 Poznań, Poland. *Anthropol Rev*, 2018;**81**: 341-350, <https://doi.org/10.2478/anre-2018-0030>.
- 27  
28  
29 21. Akbar F, AlBesharah M, Al-Baghli J, *et al*. Prevalence of low Back pain among  
30 adolescents in relation to the weight of school bags. *BMC Musculoskelet Disord*.  
31 2019;**20**: 37. <https://doi.org/10.1186/s12891-019-2398-2>.
- 32  
33  
34 22. Dudonienė V, Šakalienė R, Švedienė L, *et al*. Differences of age and gender related  
35 posture in urban and rural schoolchildren aged 7 to 10. *Education. Physical Training.*  
36 *Sport*. 2013;**1**: 25-31.
- 37  
38  
39 23. Drzał-Grabiec J, Snela S. The influence of rural environment on body posture. *Ann*  
40 *Agric Environ Med*. 2012;**19**: 846-850.
- 41  
42  
43 24. Wyszynska J, Podgórska-Bednarz J, Drzał-Grabiec J, *et al*. Analysis of Relationship  
44 between the Body Mass Composition and Physical Activity with Body Posture in  
45 Children. *BioMed Res Int*. 2016; Article ID 1851670: 10 pages,  
46 <https://doi.org/10.1155/2016/1851670>.
- 47  
48  
49 25. Walicka- Cupryś K, Skalska-Izdebska R, Drzał-Grabiec J, *et al*. Correlation between  
50 body posture and postural stability of school children. *Advances in Rehabilitation*.  
51 2013;**4**: 47-54, <https://doi.org/10.2478/rehab-2014-0026>.
- 52  
53  
54  
55  
56  
57  
58  
59  
60

- 1  
2  
3 26. Illyés A, Kiss RM. Method for determining the spatial position of the shoulder with  
4 ultrasound-based motion analyzer. *J Electromyogr Kinesiol.* 2006;**16**: 79-88,  
5 <https://doi.org/10.1016/j.jelekin.2005.06.007>.  
6  
7  
8 27. Rusek W, Pop T, Glista J, *et al.* Assessment of student's body posture with the use of  
9 Zebris system. *Prz. Med. Uniw. Rzesz. Inst. Leków.* 2010; **3**: 277-288.  
10  
11 28. Barlow SE. Expert Committee, Expert committee recommendations regarding the  
12 prevention, assessment, and treatment of child and adolescent overweight and obesity:  
13 summary report. *Pediatrics.* 2007; **120**: 164-192, [https://doi.org/10.1542/peds.2007-](https://doi.org/10.1542/peds.2007-2329C)  
14 [2329C](https://doi.org/10.1542/peds.2007-2329C).  
15  
16 29. Walicka-Cupryś K, Piwoński P, Rachwał M, *et al.* Shape of sagittal plane spinal  
17 curvatures in prematurely born children at the start of school education. *J Novel*  
18 *Physiotherapies.* 2017; **5**: 49.  
19  
20 30. Brzęk A, Dworak T, Strauss M, *et al.* The weight of pupils' schoolbags in early school  
21 age and its influence on body posture. *BMC Musculoskel Dis.* 2017;**18**:117,  
22 <https://doi.org/10.1186/s12891-017-1462-z>.  
23  
24 31. Villarrasa-Sapiña I, García-Massó X, Serra-Añó P, *et al.* Differences in intermittent  
25 postural control between normal-weight and obese children. *Gait Posture.* 2016;**49**: 1-  
26 6. <https://doi.org/10.1016/j.gaitpost.2016.06.012>.  
27  
28 32. Maciałczyk-Paprocka M, Krzyżaniak A, Kotwicki T, *et al.* Postural defects in primary  
29 school students in Poznan. *Probl Hig Epidemiol.* 2012;**2**: 309-314.  
30  
31 33. Kapo S, Rađo I, Smajlović N, *et al.* Increasing Postural Deformity Trends and Body  
32 Mass Index Analysis in School-age Children. *Zdravstveno varstvo.* 2018; 1:25-32,  
33 <https://doi.org/10.2478/sjph-2018-0004>.  
34  
35 34. Walicka-Cupryś K, Skalska-Izdebska R, Rachwał M, *et al.* Influence of the Weight of  
36 a School Backpack on Spinal Curvature in the Sagittal Plane of Seven-Year-Old  
37 Children. *BioMed Res Int.* 2015; Article ID 817913: 6 pages.  
38 <https://doi.org/10.1155/2015/817913>.  
39  
40 35. Global Health Observatory (GHO) data. [www.who.int](http://www.who.int) (accessed 7 August 2018).  
41  
42 36. Batistão MV, de Fátima Carreira Moreira R, Cote Gil Coury HJ, *et al.* Prevalence of  
43 postural deviations and associated factors in children and adolescents: a cross-sectional  
44 study. *Fisioter. Mov.* 2016;**4**: 778-785, [https://doi.org/10.1590/1980-](https://doi.org/10.1590/1980-5918.029.004.a014)  
45 [5918.029.004.a014](https://doi.org/10.1590/1980-5918.029.004.a014).  
46  
47  
48  
49  
50  
51  
52  
53  
54  
55  
56  
57  
58  
59  
60

- 1  
2  
3 37. Barszczyk K, Skolimowski T, Anwajer J, *et al.* Somatic features and parameters of  
4 anterior posterior spinal curvature in 7 years old with particular posture types. *Ortop.*  
5 *Traumatol. Rehabil.* 2005;**5**: 555-562.  
6  
7  
8 38. Pausić J, Cavala M, Katić R. Relations of the morphological characteristic latent  
9 structure and body posture indicators in children ages seven to nine years. *Coll.*  
10 *Antropol.* 2006;**3**: 621-627.  
11  
12 39. Bogucka A, Głębocka A. Body posture of children aged 9 –12 years as related to their  
13 body mass index (BMI). *Physical Activity and Health.* 2017;**12**: 1-17.  
14  
15 40. Grivas TB, Burwell RG, Mihas C, *et al.* Relatively lower body mass index  
16 is associated with an excess of severe truncal asymmetry in healthy adolescents: Do  
17 white adipose tissue, leptin, hypothalamus and sympathetic nervous system influence  
18 truncal growth asymmetry? *Scoliosis.* 2009;**4**: <https://doi.org/10.1186/1748-7161-4-13>.  
19  
20 41. Grabara M, Pstrągowska D. Estimation of the body posture in girls and boys related to  
21 their body mass index (BMI). *Med. Sport.* 2008;**4**; 231-239.  
22  
23 42. Rosa K, Muszkieta R, Zukow W, *et al.* The incidence of defects posture in children  
24 from classes I to III Elementary School. *J Health Sci.* 2013;**3**: 107-136,  
25  
26 43. Słoń A. The incidence of selected postural disorders in children aged 10 –12 years.  
27 WSKFiT. 2015;**10**:49-55.  
28  
29  
30  
31  
32  
33  
34  
35

### 36 **Acknowledgement**

37 We are grateful to the participants and their families who volunteered their time to participate  
38 in this research.

### 40 **Authors' contributions**

41 WR- conception and design, revising critically for intellectual content, final approval of the  
42 manuscript, JL- acquisition of data, drafting the article, final approval of the manuscript; JB-  
43 acquisition of data, revising critically for intellectual content, final approval of the manuscript;  
44 MA- analysis and interpretation of data, drafting the article, final approval of the manuscript;  
45 Weres Aneta,- analysis and interpretation of data, drafting the article, final approval of the  
46 manuscript; RB- acquisition of data, drafting the article, final approval of the manuscript, GI-  
47 acquisition of data, revising critically for intellectual content, final approval of the manuscript;  
48 ECL- acquisition of data, revising critically for intellectual content, final approval of the  
49 manuscript, SP- acquisition of data, drafting the article, final approval of the manuscript; TP  
50 conception and design, revising critically for intellectual content, final approval of the  
51 manuscript.  
52  
53  
54  
55  
56  
57  
58  
59  
60

### **Funding**

This research received no specific grant from any funding agency in the public, commercial or not-for-profit sectors.

### **Conflicts of interest**

The authors declare no conflict of interest.

### **Data sharing statement**

The datasets generated and/or analysed during the current study are not publicly available due to protect the students' privacy, but are available from the corresponding author on reasonable request.

### **Figure legend**

Fig. 1 Topographic points marked on the body of patients

Fig. 2 The difference in the distance of the scapula in the sagittal projection

Fig. 3 Pelvic height difference and shoulder height difference in the frontal projection

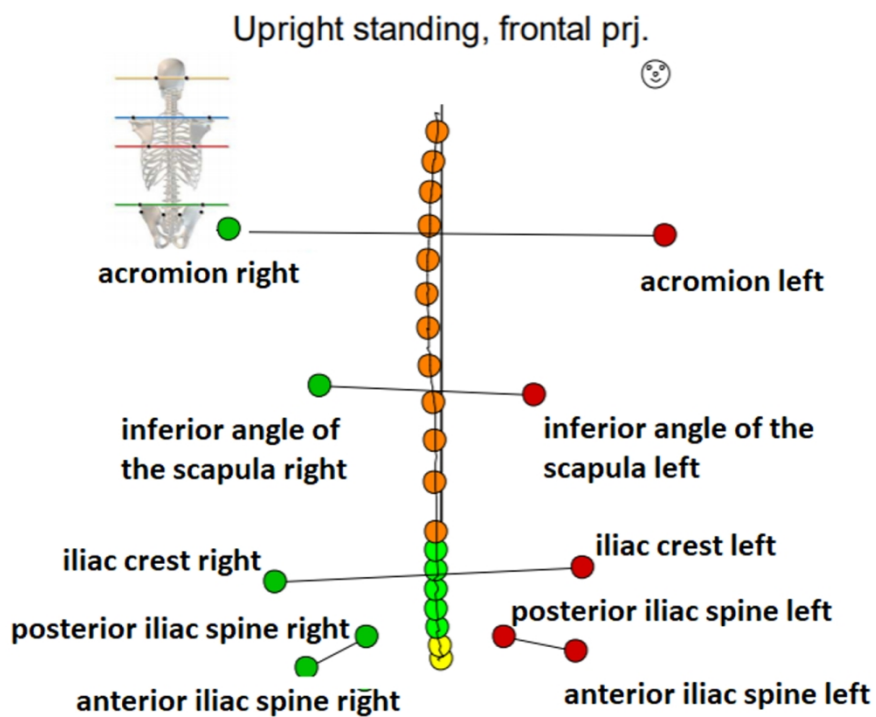

Fig. 1 Topographic points marked on the body of patients

129x93mm (300 x 300 DPI)





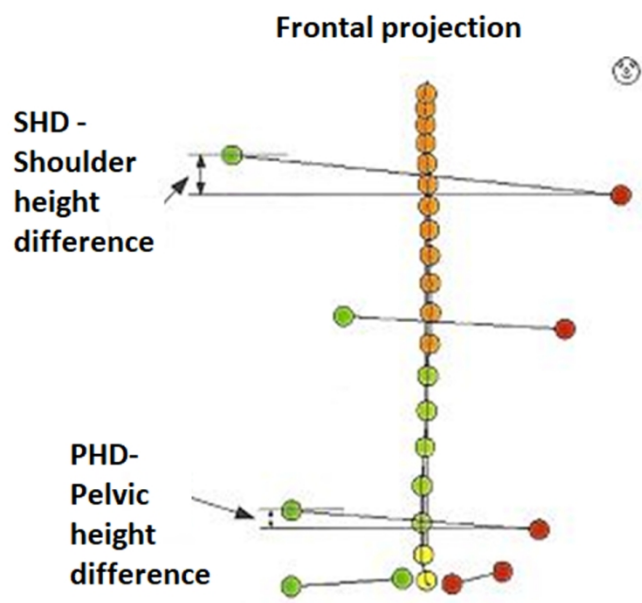

Fig. 3 Pelvic height difference and shoulder height difference in the frontal projection.

128x93mm (300 x 300 DPI)

**STROBE 2007 (v4) Statement—Checklist of items that should be included in reports of *cross-sectional studies***

| Section/Topic                | Item # | Recommendation                                                                                                                                                                       | Reported on page # |
|------------------------------|--------|--------------------------------------------------------------------------------------------------------------------------------------------------------------------------------------|--------------------|
| <b>Title and abstract</b>    | 1      | (a) Indicate the study’s design with a commonly used term in the title or the abstract                                                                                               | 1                  |
|                              |        | (b) Provide in the abstract an informative and balanced summary of what was done and what was found                                                                                  | 2                  |
| <b>Introduction</b>          |        |                                                                                                                                                                                      |                    |
| Background/rationale         | 2      | Explain the scientific background and rationale for the investigation being reported                                                                                                 | 3-4                |
| Objectives                   | 3      | State specific objectives, including any prespecified hypotheses                                                                                                                     | 4                  |
| <b>Methods</b>               |        |                                                                                                                                                                                      |                    |
| Study design                 | 4      | Present key elements of study design early in the paper                                                                                                                              | 5                  |
| Setting                      | 5      | Describe the setting, locations, and relevant dates, including periods of recruitment, exposure, follow-up, and data collection                                                      | 5                  |
| Participants                 | 6      | (a) Give the eligibility criteria, and the sources and methods of selection of participants                                                                                          | 5                  |
| Variables                    | 7      | Clearly define all outcomes, exposures, predictors, potential confounders, and effect modifiers. Give diagnostic criteria, if applicable                                             | 5-7                |
| Data sources/<br>measurement | 8*     | For each variable of interest, give sources of data and details of methods of assessment (measurement). Describe comparability of assessment methods if there is more than one group | n/a                |
| Bias                         | 9      | Describe any efforts to address potential sources of bias                                                                                                                            | 5                  |
| Study size                   | 10     | Explain how the study size was arrived at                                                                                                                                            | 5                  |
| Quantitative variables       | 11     | Explain how quantitative variables were handled in the analyses. If applicable, describe which groupings were chosen and why                                                         | n/a                |
| Statistical methods          | 12     | (a) Describe all statistical methods, including those used to control for confounding                                                                                                | 8                  |
|                              |        | (b) Describe any methods used to examine subgroups and interactions                                                                                                                  | 8                  |
|                              |        | (c) Explain how missing data were addressed                                                                                                                                          | 8                  |
|                              |        | (d) If applicable, describe analytical methods taking account of sampling strategy                                                                                                   | 8                  |
|                              |        | (e) Describe any sensitivity analyses                                                                                                                                                | 8                  |
| <b>Results</b>               |        |                                                                                                                                                                                      |                    |

|                          |     |                                                                                                                                                                                                              |       |
|--------------------------|-----|--------------------------------------------------------------------------------------------------------------------------------------------------------------------------------------------------------------|-------|
| Participants             | 13* | (a) Report numbers of individuals at each stage of study—eg numbers potentially eligible, examined for eligibility, confirmed eligible, included in the study, completing follow-up, and analysed            | 5     |
|                          |     | (b) Give reasons for non-participation at each stage                                                                                                                                                         | 5     |
|                          |     | (c) Consider use of a flow diagram                                                                                                                                                                           | n/a   |
| Descriptive data         | 14* | (a) Give characteristics of study participants (eg demographic, clinical, social) and information on exposures and potential confounders                                                                     | n/a   |
|                          |     | (b) Indicate number of participants with missing data for each variable of interest                                                                                                                          | n/a   |
| Outcome data             | 15* | Report numbers of outcome events or summary measures                                                                                                                                                         | n/a   |
| Main results             | 16  | (a) Give unadjusted estimates and, if applicable, confounder-adjusted estimates and their precision (eg, 95% confidence interval). Make clear which confounders were adjusted for and why they were included | 9     |
|                          |     | (b) Report category boundaries when continuous variables were categorized                                                                                                                                    | n/a   |
|                          |     | (c) If relevant, consider translating estimates of relative risk into absolute risk for a meaningful time period                                                                                             | n/a   |
| Other analyses           | 17  | Report other analyses done—eg analyses of subgroups and interactions, and sensitivity analyses                                                                                                               | n/a   |
| <b>Discussion</b>        |     |                                                                                                                                                                                                              |       |
| Key results              | 18  | Summarise key results with reference to study objectives                                                                                                                                                     | 12    |
| Limitations              | 19  | Discuss limitations of the study, taking into account sources of potential bias or imprecision. Discuss both direction and magnitude of any potential bias                                                   | 10-12 |
| Interpretation           | 20  | Give a cautious overall interpretation of results considering objectives, limitations, multiplicity of analyses, results from similar studies, and other relevant evidence                                   | 10-12 |
| Generalisability         | 21  | Discuss the generalisability (external validity) of the study results                                                                                                                                        | 10-12 |
| <b>Other information</b> |     |                                                                                                                                                                                                              |       |
| Funding                  | 22  | Give the source of funding and the role of the funders for the present study and, if applicable, for the original study on which the present article is based                                                | 17    |

\*Give information separately for cases and controls in case-control studies and, if applicable, for exposed and unexposed groups in cohort and cross-sectional studies.

**Note:** An Explanation and Elaboration article discusses each checklist item and gives methodological background and published examples of transparent reporting. The STROBE checklist is best used in conjunction with this article (freely available on the Web sites of PLoS Medicine at <http://www.plosmedicine.org/>, Annals of Internal Medicine at <http://www.annals.org/>, and Epidemiology at <http://www.epidem.com/>). Information on the STROBE Initiative is available at [www.strobe-statement.org](http://www.strobe-statement.org).

# BMJ Open

## The role of body mass category in the development of faulty postures in school age children from a rural area in south-eastern Poland – a cross-sectional study

|                                 |                                                                                                                                                                                                                                                                                                                                                                                                                                                                                                                                                                                                                                                                                                                                                                                        |
|---------------------------------|----------------------------------------------------------------------------------------------------------------------------------------------------------------------------------------------------------------------------------------------------------------------------------------------------------------------------------------------------------------------------------------------------------------------------------------------------------------------------------------------------------------------------------------------------------------------------------------------------------------------------------------------------------------------------------------------------------------------------------------------------------------------------------------|
| Journal:                        | <i>BMJ Open</i>                                                                                                                                                                                                                                                                                                                                                                                                                                                                                                                                                                                                                                                                                                                                                                        |
| Manuscript ID                   | bmjopen-2019-030610.R2                                                                                                                                                                                                                                                                                                                                                                                                                                                                                                                                                                                                                                                                                                                                                                 |
| Article Type:                   | Original research                                                                                                                                                                                                                                                                                                                                                                                                                                                                                                                                                                                                                                                                                                                                                                      |
| Date Submitted by the Author:   | 10-Sep-2019                                                                                                                                                                                                                                                                                                                                                                                                                                                                                                                                                                                                                                                                                                                                                                            |
| Complete List of Authors:       | Rusek, Wojciech; Rehabilitation Centre REHAMED-CENTER, Tajęcina 66a, 36- 002 Tajęcina, Poland<br>Leszczak, Justyna; University of Rzeszow, Faculty of Medicine, Institute of Physiotherapy,<br>Baran, Joanna; Medical Faculty<br>Adamczyk, Marzena; RehaKlinika, 35-959 Rzeszów, Poland<br>Weres, Aneta; University of Rzeszow, Faculty of Medicine, Institute of Physiotherapy<br>Baran, Rafał; Rehabilitation Centre REHAMED-CENTER<br>Inglot, Grzegorz; Clinical Provincial Hospital No. 2, ul. Lwowska 60, 35-301 Rzeszów, Poland<br>Czenczek-Lewandowska, Ewelina; University of Rzeszow, Faculty of Medicine, Institute of Physiotherapy<br>Porada, Sławomir; Trzebownisko Commune Office<br>Pop, Teresa; University of Rzeszow, Faculty of Medicine, Institute of Physiotherapy |
| <b>Primary Subject Heading</b>: | Public health                                                                                                                                                                                                                                                                                                                                                                                                                                                                                                                                                                                                                                                                                                                                                                          |
| Secondary Subject Heading:      | Public health                                                                                                                                                                                                                                                                                                                                                                                                                                                                                                                                                                                                                                                                                                                                                                          |
| Keywords:                       | posture, body mass index, child, rural population                                                                                                                                                                                                                                                                                                                                                                                                                                                                                                                                                                                                                                                                                                                                      |
|                                 |                                                                                                                                                                                                                                                                                                                                                                                                                                                                                                                                                                                                                                                                                                                                                                                        |

SCHOLARONE™  
Manuscripts

1  
2  
3 **The role of body mass category in the development of faulty postures in school age**  
4 **children from a rural area in south-eastern Poland – a cross-sectional study**  
5  
6  
7

8 Wojciech Rusek<sup>1</sup>, Justyna Leszczak<sup>1,2</sup>, Joanna Baran<sup>1,2</sup>, Marzena Adamczyk<sup>1,3</sup>, Aneta  
9 Weres<sup>2</sup>, Rafał Baran<sup>1</sup>, Grzegorz Inglot<sup>4</sup>, Ewelina Czenczek-Lewandowska<sup>2</sup>, Sławomir  
10 Porada<sup>5</sup>, Teresa Pop<sup>2</sup>  
11  
12  
13  
14

15 1. Rehabilitation Centre REHAMED-CENTER, Tajęcina 66a, 36- 002 Tajęcina, Poland

16 2. University of Rzeszow, Faculty of Medicine, Institute of Physiotherapy, Institute of Physiotherapy,  
17 Medical Faculty, University of Rzeszów Ul. Kopisto 2a, 35-959, Rzeszów, Poland

18 3. RehaKlinika, 35-959 Rzeszów, Poland

19 4. Clinical Provincial Hospital No. 2, ul. Lwowska 60, 35- 301 Rzeszów, Poland

20 5. Trzebownisko Commune Office, 36-001 Trzebownisko 976  
21  
22  
23  
24  
25  
26  
27  
28

29 **Corresponding Author**

30 Justyna Leszczak, Ph.D.

31 Email address: leszczakjustyna.ur@gmail.com

32 Institute of Physiotherapy, Medical Faculty, University of Rzeszów

33 Ul. Kopisto 2a

34 35-959, Rzeszów, Poland

35 ORCID: 0000-0001-8769-0048  
36  
37  
38  
39  
40  
41  
42  
43  
44  
45  
46  
47  
48  
49  
50  
51  
52  
53  
54  
55  
56  
57  
58  
59  
60

**Word count:** 3612

## Abstract

**Objective.** The aim of the study was to assess the relationship between Body Mass Index and the incidence of abnormalities in selected parameters measured in the trunk area.

**Design.** Cross-sectional studies.

**Setting.** The research was conducted in a primary school in the Trzebownisko Municipality, a rural area in south-eastern Poland.

**Participants.** A group of 464 children, ranging in age from 6 to 16 years (234 boys and 230 girls), was recruited to participate in the study.

**Outcome Measures.** The examination of their body postures was conducted with the use of the Zebris system. Body mass was determined using a body mass analyser Tanita MC – 780 MA. Body mass index (BMI) was calculated based on the acquired data.

**Results.** It was noticed that the children with overweight and obesity tended to have an incorrect position of the shoulders and pelvis in comparison to children with normal body weight. It was found that greater body mass (higher BMI index) coincided with a larger distance of the scapulae from the frontal plane ( $p=0.009$ ).

**Conclusions.** Increase in children's BMI produces adverse effects in the position of the shoulder blades, reflected by their greater distance from the frontal plane. Increase in BMI is not significantly related to the position of the shoulder joints or pelvis; however, the subjects with overweight or obesity presented a greater difference in the position of the shoulder joints and pelvis.

Key words. Posture, Body Mass Index, Child, Rural Population

### Strengths of this study

- The homogeneity and large size of the study group from rural areas.
- Objective and standardized measuring devices.

## Limitations of this study

- We cannot entirely rule out the possibility of unmeasured or unknown confounding factors (parental genetic predisposition to higher BMI) that may account for the associations observed in this study. However, the homogeneity of the study population and comprehensive data on the risk factors minimized potential confounding effects.
- Other elements that can affect trunk muscle tension include muscular problems, e.g. neonatal hypertonia or hypotonia and their consequences in childhood, as well as past injuries and chronic neurological diseases, and these should be taken into account in future studies.

## Introduction

A child's correct body posture favourably affects the growth of their whole body <sup>1</sup>. It contributes for instance to the normal development and functioning of body organs, and improves the effectiveness of motor activity and general well-being <sup>2</sup>. If they are developed early in life, correct motor habits contribute to normal development of the muscles, joints and ligaments and provide beneficial stimulation to the child's growing skeleton. Even the smallest defects in the body posture of a school-age child can lead to the development of a habitual bad posture and, consequently, to health problems <sup>3-4</sup>.

Body postures are subject to large changeability, which depends on such factors as age, sex, somatic type, ethnicity, environment and psychophysical condition. The major risk factors that may induce the development of incorrect body posture include excessive body mass in relation to height and age <sup>5-6</sup>. A vast majority of overweight or obese children live in developed countries with growth rates over 30% higher compared to the developing countries. If the current trends continue, the number of overweight or obese infants worldwide will increase to 70 million in 2025 <sup>7</sup>. Overweight and obesity in children, often associated with insufficient physical activity, lead to decreased use of the motor system; at the same time the increasing fat deposition contributes to overloading of the skeletal system, and this is a precondition for the development of postural defects <sup>8</sup>. Children with body mass above the 95th centile (BMI z-score > +2 SD) far more often present postural defects involving the spine, thoracic cage, as well as lower limbs, and suffer from musculoskeletal pain <sup>9</sup>.

Maciałczyk- Paprocka K. et al. report that postural deficits may affect as many as 74.1% of boys and 85.5% of girls with excessive body mass, and the predominant problems include knock knees and fallen arches <sup>10</sup>. Also, in the last decades there has been an unprecedented increase in the number of obese children, and the problem is associated with a number



1  
2  
3 of functional disorders, e.g. pain, joint stiffness and reduced muscle strength, which contribute  
4 to the development of poor posture. General rates of obesity among children worldwide are  
5 estimated at the level of 10% and, like in the case of postural deficits, the problem is constantly  
6 growing. The top of the ranking is dominated by the North American countries including the  
7 USA, where the level of overweight and obesity reaches the unprecedented rates of almost 32%.  
8 In Western Europe the rates reach up to 20%, whereas in Central and Eastern Europe they reach  
9 the level of 16% <sup>11-12</sup>.

15 According to numerous clinical data, a child's body posture is particularly at risk during  
16 the periods of the fastest pace of growth, which mainly include the time corresponding to the  
17 start of school education (6-7 years of life) and the puberty period (12-16 years of life). In view  
18 of the above, research focusing on body posture in school-age children, taking into account  
19 body mass, is of particular importance <sup>12-14</sup>.

24 According to the data reported in the literature, the rate of overweight and obesity in  
25 children is consistently increasing <sup>15</sup>. A similar situation is observed in the case of postural  
26 defects <sup>16</sup>. In previously conducted studies numerous authors have investigated factors affecting  
27 obesity or postural defects, though usually focusing on these problems separately <sup>15,17-18</sup>. There  
28 are no studies that link these two aspects to each other. Additionally, the majority of the reports  
29 are related to children from urban areas, more affected by globalisation, and those from highly  
30 developed countries where children more commonly present musculoskeletal disorders related  
31 to incorrect body posture <sup>19-21</sup>. On the other hand, it would be worthwhile to carry out related  
32 research focusing on rural areas where children grow up in more natural environments, have  
33 more opportunities for outdoor activity, and better access to healthy food, yet they are also  
34 frequently affected by the two problems <sup>22-23</sup>. Overweight and obesity occur much more often  
35 among children and teenagers from rural areas, compared to towns and cities, mostly from  
36 multi-child families of low economic status, where the education level of the parents is quite  
37 low. The problem mainly affects the population of developmental age, and so the scale of the  
38 phenomenon is a matter of concern <sup>24</sup>. There is also a scarcity of studies examining body posture  
39 with objective measurement methods, such as the Zebris APGMS Pointer, which performs  
40 detailed assessment of static body posture, range of motion and the shape of spinal curves <sup>10</sup>.

53 The aim of the study was to assess the relationship between Body Mass Index and  
54 abnormalities in the trunk area, i.e. scapula distance difference, pelvic height difference and  
55 shoulder height difference in children living in rural communities.  
56  
57  
58  
59  
60

## Material and methods

The study was accepted by the local Bioethical Commission on 28 June 2016 (Consent No. 2016/06/28). The participants were informed about the course of the study. The examinations were conducted after written consent was received from the headmasters of the schools, parents of the children participating in the project and the children themselves.

### *Participants*

Firstly, the sample size was calculated with reference to the total number of children (n=3790) living in the Trzebowniko Municipality, a rural area in south-eastern Poland, with a 95% confidence level and a confidence interval of 0.05. It was calculated that the minimum sample size should be 349. The study took into account 464 school-age children, from 6 to 16 years of age (234 boys and 230 girls). They were qualified for the study (from June 2016 to March 2018), designed to be conducted in schools in a rural region. Five primary and secondary schools were randomly selected out of the nine schools located in the specific rural region in the south-eastern area of the country in which the study was conducted. Examinations were conducted in nurses' offices in the relevant educational facilities. In order to ensure the reliability of the measurements, all the subjects were examined in the morning, on an empty stomach, by the same members of a qualified team.

The study applied the following inclusion criteria: age from 6-16 years and consent of the parents and children for the examination. Exclusion criteria: metal implants, electronic implants, periods in girls, epilepsy and failure to refrain from eating in the morning on the day of the study. Children with a diagnosis of neonatal hypertonia or hypotonia, chronic neurological diseases or past injuries and surgical interventions during the last 6 months before examination were excluded from the study group.

### *Body Posture*

The study of body posture was conducted with the use of the Zebris APGMS Pointer system. An examination is carried out with an ultrasound pointer used to mark characteristic anatomical locations corresponding to specific bone structures on the patient's body. These locations are treated by the software as passive points. Their position and movement are tracked and recorded in real time by the software. The study was carried out in static conditions, in a motionless standing position.

The reference markers were three miniature transmitters attached to the patient with flexible straps. These define points with reference to which the device specifies the positions

1  
2  
3 of pointer markers. By applying the pointer to the characteristic anatomical locations on the  
4 body and by activating the device it is possible to visualise the relevant points on the screen and  
5 to create a three-dimensional image of the body posture<sup>25-26</sup>.  
6  
7

8 At the start, topographic points were marked on the body of each subject to correspond  
9 with: acromion right and left, posterior iliac spine right and left, anterior iliac spine right and  
10 left, iliac crest right and left, the point where the thoracic spine meets the lumbar spine, Th  
11 12/L1, inferior angle of the scapula right and left, spinous process of the spine. A sample result  
12 of the examination as well as the defined topographic points are shown in Figure 1 (Fig.1).  
13  
14

15 Based on the defined topographic points, the software computes the values of selected  
16 body posture parameters. The following were taken into account in the assessment of posture:  
17 - in the sagittal projection: scapula distance difference (SDD in mm) (Fig.2),  
18 - in the frontal projection: pelvic height difference (PHD in mm) and shoulder height difference  
19 (SHD in mm) (Fig.3).  
20  
21  
22  
23  
24

25 During the examination the subject, wearing no shoes, was asked to assume a relaxed  
26 standing position, with his/her back to the measurement unit, and did not have with him/her any  
27 devices interfering with the transfer of data (e.g. smartwatch, mobile phone).  
28  
29

30 Following calibration of the horizontal plane, the subject's body posture was examined.  
31 The measurement, performed with an ultrasound pointer, involved registration of the  
32 topographic points marked earlier on the subject's body. The measurements were performed  
33 three times in each subject and the spine line was scanned 9 times (three times in each  
34 examination). The final result was the mean value of the measurements<sup>27</sup>.  
35  
36  
37  
38  
39

### 40 ***Anthropometric Measurements and Bioelectrical Impedance***

41 Body height was measured with an accuracy up to 0.1 cm, with the use of a portable  
42 stadiometer PORTSTAND 210. Body mass was measured with the Tanita MC – 780 MA  
43 analyser with an accuracy up to 0.1 kg. The examinations were conducted in standard  
44 conditions. During the measurement, each subject was barefoot and dressed in underwear, and  
45 was asked to assume an upright extended position.  
46  
47  
48  
49

50 The data acquired during the measurement of body height and mass were used  
51 to calculate the body mass index (BMI). The BMI value was examined by reference to the  
52 growth chart, taking into account sex and age. Based on the achieved percentile ranking, the  
53 BMI status was classified in the following four categories: obesity (BMI  $\geq$  95<sup>th</sup> percentile),  
54 overweight (BMI  $\geq$  85<sup>th</sup> percentile and  $<$ 95<sup>th</sup> percentile), normal body mass (BMI  $<$ 85<sup>th</sup>  
55 percentile and  $\geq$  5<sup>th</sup> percentile), and underweight (BMI  $<$ 5<sup>th</sup> percentile)<sup>28</sup>.  
56  
57  
58  
59  
60

### **Data analysis**

Spearman's rank correlation test was applied to assess the correlation between BMI and body posture. Differences in the selected parameters between the groups were analysed using the Kruskal-Wallis test. The accepted level of significance was  $\alpha < 0.05$ . All calculations and statistical analyses were performed with the use of STATISTICA ver. 10.0 (StatSoft, Poland).

### **Patient and public involvement**

Patients and the public were not involved in the design of the study. The parents of the children who participated in the study received the results of the measurements and recommendations about treatment opportunities.

### **Results**

The characteristics of the study group are shown in Table 1 and 2. On average the subjects were 11.52 years old (SD=2.99). The mean body height was 152.48cm (SD=17.77) and the mean body mass was 45.39kg (SD=16.81). On average the subjects' body mass index was 18.8kg/m<sup>2</sup> (SD=3.75) (Tab. 1).

Table 1. Characteristics of the study group

|                               | <b>N</b> | <b>Mean</b> | <b>Me</b> | <b>SD</b> | <b>Q<sub>1</sub></b> | <b>Q<sub>3</sub></b> |
|-------------------------------|----------|-------------|-----------|-----------|----------------------|----------------------|
| <b>All</b>                    |          |             |           |           |                      |                      |
| <b>Age [years]</b>            | 464      | 11.52       | 12.00     | 2.99      | 9.00                 | 14.00                |
| <b>Height [cm]</b>            | 464      | 152.48      | 155.50    | 17.77     | 137.00               | 167.00               |
| <b>Weight [kg]</b>            | 464      | 45.39       | 44.75     | 16.81     | 30.40                | 56.45                |
| <b>BMI [kg/m<sup>2</sup>]</b> | 464      | 18.80       | 18.24     | 3.75      | 16.10                | 20.97                |
| <b>Girls</b>                  |          |             |           |           |                      |                      |
| <b>Age [years]</b>            | 230      | 11.55       | 12        | 2.96      | 9.00                 | 14.00                |
| <b>Height [cm]</b>            | 230      | 150.46      | 155       | 15.69     | 136.00               | 163.00               |
| <b>Weight [kg]</b>            | 230      | 43.63       | 44.35     | 15.38     | 29.70                | 54.60                |
| <b>BMI [kg/m<sup>2</sup>]</b> | 230      | 18.64       | 18.00     | 3.87      | 15.90                | 20.90                |
| <b>Boys</b>                   |          |             |           |           |                      |                      |
| <b>Age [years]</b>            | 234      | 11.49       | 12        | 3.02      | 9.00                 | 14.00                |
| <b>Height [cm]</b>            | 234      | 154.46      | 156.50    | 19.43     | 138.00               | 172.00               |
| <b>Weight [kg]</b>            | 234      | 47.13       | 45        | 17.97     | 31.80                | 60.00                |
| <b>BMI [kg/m<sup>2</sup>]</b> | 234      | 18.94       | 18.56     | 3.63      | 16.40                | 21.05                |

Me: median; n: number of subjects; Q<sub>1</sub>: first quartile; Q<sub>3</sub>: third quartile SD: standard deviation;

Based on the BMI percentiles a categorization of the body mass of the study group was performed. 6.8% of the boys and in 7.4% of the girls were found to be underweight. Normal body mass was identified in 72.7 % of the boys and 74.8 % of the girls. 11.5% of the boys and in 12.2 % of the girls were found to be overweight, and obesity was identified in 9 % of the boys and in 5.7% of the girls (Tab. 2).

Table 2. The body mass category based on BMI depending on the sex

| BMI Category            | Sex                      |        |       |        |       |        |
|-------------------------|--------------------------|--------|-------|--------|-------|--------|
|                         | Boys                     |        | Girls |        | Total |        |
|                         | N                        | %      | n     | %      | N     | %      |
| <b>Underweight</b>      | 16                       | 6,8%   | 17    | 7,4%   | 33    | 7,1%   |
| <b>Normal body mass</b> | 170                      | 72,7%  | 172   | 74,8%  | 342   | 73,7%  |
| <b>Overweight</b>       | 27                       | 11,5%  | 28    | 12,2%  | 55    | 11,9%  |
| <b>Obesity</b>          | 21                       | 9,0%   | 13    | 5,6%   | 34    | 7,3%   |
| <b>Total</b>            | 234                      | 100,0% | 230   | 100,0% | 464   | 100,0% |
| <b>Significance(p)</b>  | $\chi^2(3)=1,90$ p=0,591 |        |       |        |       |        |

%; percent of subjects; n: number of subjects; p: test probability value;  $\chi^2$ - chi-square Pearson test.

Analyses of the correlations between BMI and the body posture parameters measured in the trunk area showed statistically significant differences in the case of the distance of the scapulae from the corresponding plane. Statistical significance was not observed in the relationship of the position of the pelvis ( $H=5.33$  p=0.150) and the BMI index. It was found that greater body mass (higher BMI index) coincided with a larger distance of the scapulae from the frontal plane ( $H=11.47$  p=0.009). It was noticed that people with overweight and obesity have incorrect position of the shoulders and pelvis in comparison to people with normal body weight. (Tab. 3).

Table 3. The correction between the body mass category, based on BMI and the body posture

| Scapula distance difference (SDD in mm) |     |                       |      |      |      |       |      |       |
|-----------------------------------------|-----|-----------------------|------|------|------|-------|------|-------|
| BMI category                            | N   | Mean<br>(95%CI)       | SD   | Me   | Min. | Max.  | Q1   | Q3    |
| Underweight                             | 33  | 4,58<br>(3,13-6,02)   | 6,07 | 3,00 | 0,00 | 18,00 | 2,00 | 6,00  |
| Normal Body<br>Mass                     | 342 | 6,90<br>(6,27-7,53)   | 6,13 | 5,50 | 0,00 | 32,00 | 2,00 | 9,00  |
| Overweight                              | 55  | 8,04<br>(6,34-9,73)   | 6,16 | 6,00 | 0,00 | 28,00 | 4,00 | 10,00 |
| Obesity                                 | 34  | 9,50<br>(6,44-12,56)  | 6,10 | 7,00 | 0,00 | 41,00 | 4,00 | 10,00 |
| H=11,47 p=0,009                         |     |                       |      |      |      |       |      |       |
| Shoulder height difference (SHD in mm)  |     |                       |      |      |      |       |      |       |
| BMI category                            | N   | Mean<br>(95%CI)       | SD   | Me   | Min. | Max.  | Q1   | Q3    |
| Underweight                             | 33  | 6,96<br>(4,98-8,93)   | 6,90 | 5,50 | 0,10 | 19,60 | 2,10 | 10,80 |
| Normal Body<br>Mass                     | 342 | 10,00<br>(9,16-10,84) | 6,72 | 8,00 | 0,10 | 59,80 | 4,10 | 14,60 |
| Overweight                              | 55  | 10,66<br>(8,33-12,99) | 8,45 | 7,40 | 0,50 | 32,80 | 3,70 | 16,50 |
| Obesity                                 | 34  | 11,04<br>(7,99-14,09) | 7,74 | 9,35 | 0,50 | 39,90 | 5,20 | 15,10 |
| H=5,43 p=0,143                          |     |                       |      |      |      |       |      |       |
| Pelvis height difference (PHD in mm)    |     |                       |      |      |      |       |      |       |
| BMI category                            | N   | Mean<br>(95%CI)       | SD   | Me   | Min. | Max.  | Q1   | Q3    |
| Underweight                             | 33  | 9,27<br>(6,83-11,72)  | 5,57 | 7,70 | 0,10 | 23,20 | 3,60 | 12,50 |
| Normal Body<br>Mass                     | 342 | 7,97<br>(7,25-8,68)   | 7,90 | 6,30 | 0,00 | 35,60 | 2,60 | 11,10 |
| Overweight                              | 55  | 9,96<br>(7,67-12,24)  | 8,62 | 7,40 | 0,10 | 37,40 | 4,50 | 14,70 |
| Obesity                                 | 34  | 10,07<br>(7,37-12,77) | 8,74 | 7,50 | 0,20 | 28,80 | 4,70 | 15,90 |
| H=5,33 p=0,150                          |     |                       |      |      |      |       |      |       |

H: Kruskal-Wallis test; SD: standard deviation; CI: confidence interval; Max: maximum value; Me: median; Min: minimum value; n: number of subjects; p: test probability value; Q1: quartile 25.; Q3: quartile 75.

## Discussion

The start of school education marks a period when a child's posture is very sensitive to changes due to the new co-occurring environmental factors. The adverse risk factors include mainly the long periods when the child remains seated in class and during other school-related activities, wearing a heavy schoolbag, asymmetry of schoolbag straps, or asymmetric position of a schoolbag worn by the child, as well as more frequently occurring fatigue and stressful experiences at school. All of these may promote different postural habits involving more pronounced thoracic kyphosis and downward head positioning<sup>29-30</sup>. As a result, natural physical activity is restricted to a degree, and children tend to spend their free time in a passive way, in front of a computer or TV. This situation produces adverse effects because a sedentary lifestyle not only increases the risk of excessive body mass in the children but also contributes to the development of postural deficits.

The time when a child attends school may produce beneficial effects as it is likely to foster development of habits related to physical activity and sport, which are of extreme importance for ensuring the child's normal physical development<sup>31-32</sup>. It is important to enable early diagnosis, since body posture in adults to a large degree is a result of the early stages of development<sup>33-34</sup>. It should be emphasised that early and non-invasive body posture studies among school age children, with the use of the external diagnostic systems, are crucially important.

The current study enabled the assessment of body posture parameters in relation to the body mass index category identified in children attending primary and middle schools. In the study group 6.8% of the boys and in 7.4% of the girls were identified as being underweight. Normal body mass was found in 72.7% of the boys and 74.8% of the girls. 11.5% of the boys and in 12.2% of the girls were identified as being overweight. Obesity was found in 9% of the boys and in 5.7% of the girls. These values are similar to the data published by the WHO, according to which in 2016 overweight and obesity were found in 18% of children and adolescents between 5 and 19 years of age<sup>35</sup>.

The current study shows a strong correlation between the BMI and the body posture parameters. Also, a correlation was found between the height of the left shoulder and excessive weight. Children with higher BMI were far more often found to have a decreased distance between the scapula and the frontal plane.

A study by Batista et al., involving 288 school age children, reported asymmetry in the position of shoulders in 74.3% of the subjects; the problem was particularly pronounced among older children, aged 13-15, which supports the claim that this type of deficit may be associated

1  
2  
3 with the rapid growth of specific segments of the body occurring during puberty. In fact, the  
4 problem appears to be more closely related to age than to body mass. These asymmetries in the  
5 position of the shoulders may also be explained by the varied overloads of the body linked with  
6 environmental factors, e.g. asymmetrical body posture in sitting position and carrying of  
7 schoolbags on one side, a habit frequently observed in teenagers<sup>36</sup>. As shown by the present  
8 study, incorrect body mass may also be a contributing factor, producing similar effects.  
9

10  
11  
12  
13 Many authors have discussed the relation of body posture and BMI. An important  
14 problem was pointed out by Pausić et al. as well as Barszczyk et al. who claim that both  
15 excessively low and excessively high body mass lead to negative changes in the position of the  
16 spine, lower extremities and feet<sup>37-38</sup>. Partly similar results were reported by Walicka- Cupryś  
17 et al. These authors examined children with genu valgum and found that the defect was most  
18 common in overweight children (28.6%), followed by children with normal weight (14.7%),  
19 and it was least frequent in underweight subjects (10.7 %) <sup>25</sup>.

20  
21  
22  
23  
24  
25  
26 Bogucka et al. in their study examined the body posture of 227 school age children. The  
27 authors observed that in the subgroup of underweight girls, the protruding scapulae were present  
28 significantly more often than in their peers with normal weight and height. However,  
29 underweight boys more frequently than their peers with normal BMI were characterized by  
30 asymmetry of the scapulae towards the spine. It was suggested that faulty body postures in the  
31 scapulae area occurred more frequently in underweight subjects ( $r = 0.359$ ;  $p < 0.001$ ) <sup>39</sup>.

32  
33  
34  
35  
36 Likewise, Grivas et al. reported that excessively low BMI is more frequently associated  
37 with body asymmetry in teenagers <sup>40</sup>. Similar conclusions can be drawn from the study  
38 by Grabara et. al <sup>41</sup>. The present study identified the opposite tendency. Children with greater  
39 body mass (overweight and obesity) were found to have a larger distance between the scapulae  
40 and the frontal plane ( $H=11.47$   $p=0.009$ ). However, all the above findings suggest that height-  
41 and weight-related abnormalities are closely linked with postural defects during developmental  
42 age.  
43  
44  
45  
46  
47

48  
49  
50  
51  
52  
53  
54  
55  
56  
57  
58  
59  
60  
61  
62  
63  
64  
65  
66  
67  
68  
69  
70  
71  
72  
73  
74  
75  
76  
77  
78  
79  
80  
81  
82  
83  
84  
85  
86  
87  
88  
89  
90  
91  
92  
93  
94  
95  
96  
97  
98  
99  
100  
101  
102  
103  
104  
105  
106  
107  
108  
109  
110  
111  
112  
113  
114  
115  
116  
117  
118  
119  
120  
121  
122  
123  
124  
125  
126  
127  
128  
129  
130  
131  
132  
133  
134  
135  
136  
137  
138  
139  
140  
141  
142  
143  
144  
145  
146  
147  
148  
149  
150  
151  
152  
153  
154  
155  
156  
157  
158  
159  
160  
161  
162  
163  
164  
165  
166  
167  
168  
169  
170  
171  
172  
173  
174  
175  
176  
177  
178  
179  
180  
181  
182  
183  
184  
185  
186  
187  
188  
189  
190  
191  
192  
193  
194  
195  
196  
197  
198  
199  
200  
201  
202  
203  
204  
205  
206  
207  
208  
209  
210  
211  
212  
213  
214  
215  
216  
217  
218  
219  
220  
221  
222  
223  
224  
225  
226  
227  
228  
229  
230  
231  
232  
233  
234  
235  
236  
237  
238  
239  
240  
241  
242  
243  
244  
245  
246  
247  
248  
249  
250  
251  
252  
253  
254  
255  
256  
257  
258  
259  
260  
261  
262  
263  
264  
265  
266  
267  
268  
269  
270  
271  
272  
273  
274  
275  
276  
277  
278  
279  
280  
281  
282  
283  
284  
285  
286  
287  
288  
289  
290  
291  
292  
293  
294  
295  
296  
297  
298  
299  
300  
301  
302  
303  
304  
305  
306  
307  
308  
309  
310  
311  
312  
313  
314  
315  
316  
317  
318  
319  
320  
321  
322  
323  
324  
325  
326  
327  
328  
329  
330  
331  
332  
333  
334  
335  
336  
337  
338  
339  
340  
341  
342  
343  
344  
345  
346  
347  
348  
349  
350  
351  
352  
353  
354  
355  
356  
357  
358  
359  
360  
361  
362  
363  
364  
365  
366  
367  
368  
369  
370  
371  
372  
373  
374  
375  
376  
377  
378  
379  
380  
381  
382  
383  
384  
385  
386  
387  
388  
389  
390  
391  
392  
393  
394  
395  
396  
397  
398  
399  
400  
401  
402  
403  
404  
405  
406  
407  
408  
409  
410  
411  
412  
413  
414  
415  
416  
417  
418  
419  
420  
421  
422  
423  
424  
425  
426  
427  
428  
429  
430  
431  
432  
433  
434  
435  
436  
437  
438  
439  
440  
441  
442  
443  
444  
445  
446  
447  
448  
449  
450  
451  
452  
453  
454  
455  
456  
457  
458  
459  
460  
461  
462  
463  
464  
465  
466  
467  
468  
469  
470  
471  
472  
473  
474  
475  
476  
477  
478  
479  
480  
481  
482  
483  
484  
485  
486  
487  
488  
489  
490  
491  
492  
493  
494  
495  
496  
497  
498  
499  
500  
501  
502  
503  
504  
505  
506  
507  
508  
509  
510  
511  
512  
513  
514  
515  
516  
517  
518  
519  
520  
521  
522  
523  
524  
525  
526  
527  
528  
529  
530  
531  
532  
533  
534  
535  
536  
537  
538  
539  
540  
541  
542  
543  
544  
545  
546  
547  
548  
549  
550  
551  
552  
553  
554  
555  
556  
557  
558  
559  
560  
561  
562  
563  
564  
565  
566  
567  
568  
569  
570  
571  
572  
573  
574  
575  
576  
577  
578  
579  
580  
581  
582  
583  
584  
585  
586  
587  
588  
589  
590  
591  
592  
593  
594  
595  
596  
597  
598  
599  
600  
601  
602  
603  
604  
605  
606  
607  
608  
609  
610  
611  
612  
613  
614  
615  
616  
617  
618  
619  
620  
621  
622  
623  
624  
625  
626  
627  
628  
629  
630  
631  
632  
633  
634  
635  
636  
637  
638  
639  
640  
641  
642  
643  
644  
645  
646  
647  
648  
649  
650  
651  
652  
653  
654  
655  
656  
657  
658  
659  
660  
661  
662  
663  
664  
665  
666  
667  
668  
669  
670  
671  
672  
673  
674  
675  
676  
677  
678  
679  
680  
681  
682  
683  
684  
685  
686  
687  
688  
689  
690  
691  
692  
693  
694  
695  
696  
697  
698  
699  
700  
701  
702  
703  
704  
705  
706  
707  
708  
709  
710  
711  
712  
713  
714  
715  
716  
717  
718  
719  
720  
721  
722  
723  
724  
725  
726  
727  
728  
729  
730  
731  
732  
733  
734  
735  
736  
737  
738  
739  
740  
741  
742  
743  
744  
745  
746  
747  
748  
749  
750  
751  
752  
753  
754  
755  
756  
757  
758  
759  
760  
761  
762  
763  
764  
765  
766  
767  
768  
769  
770  
771  
772  
773  
774  
775  
776  
777  
778  
779  
780  
781  
782  
783  
784  
785  
786  
787  
788  
789  
790  
791  
792  
793  
794  
795  
796  
797  
798  
799  
800  
801  
802  
803  
804  
805  
806  
807  
808  
809  
810  
811  
812  
813  
814  
815  
816  
817  
818  
819  
820  
821  
822  
823  
824  
825  
826  
827  
828  
829  
830  
831  
832  
833  
834  
835  
836  
837  
838  
839  
840  
841  
842  
843  
844  
845  
846  
847  
848  
849  
850  
851  
852  
853  
854  
855  
856  
857  
858  
859  
860  
861  
862  
863  
864  
865  
866  
867  
868  
869  
870  
871  
872  
873  
874  
875  
876  
877  
878  
879  
880  
881  
882  
883  
884  
885  
886  
887  
888  
889  
890  
891  
892  
893  
894  
895  
896  
897  
898  
899  
900  
901  
902  
903  
904  
905  
906  
907  
908  
909  
910  
911  
912  
913  
914  
915  
916  
917  
918  
919  
920  
921  
922  
923  
924  
925  
926  
927  
928  
929  
930  
931  
932  
933  
934  
935  
936  
937  
938  
939  
940  
941  
942  
943  
944  
945  
946  
947  
948  
949  
950  
951  
952  
953  
954  
955  
956  
957  
958  
959  
960  
961  
962  
963  
964  
965  
966  
967  
968  
969  
970  
971  
972  
973  
974  
975  
976  
977  
978  
979  
980  
981  
982  
983  
984  
985  
986  
987  
988  
989  
990  
991  
992  
993  
994  
995  
996  
997  
998  
999  
1000

People with overweight and obesity show higher abnormalities in the position of the shoulders and pelvis than people with normal weight. Age-related analysis of the study group showed a negative correlation between the subjects' age and oblique position of the pelvis ( $r=0.09$ ,  $p=0.049$ ). Similarly, Rosa et al. reported low rates of incorrect pelvis position in grade I-III children. No related abnormalities were identified in 68% of the girls and 72% of the boys <sup>42</sup>. Different findings were reported by Słoń, who performed similar measurements in a group of 162 primary school students (grades IV-VI) in Warsaw. The author observed incorrect position of the pelvis in 77% of the subjects <sup>43</sup>.



1  
2  
3 The current study enabled the assessment of BMI in relation to the incidence of  
4 abnormalities in selected parameters measured in the trunk area. In the literature we can find  
5 data related to the growing number of children and teenagers with excessive body weight,  
6 as well as more and more evidence proving the adverse health related effects of overweight and  
7 obesity. Excessive body weight to a large extent contributes to postural defects, and adversely  
8 affects health condition, as well as body water and electrolyte balance. That is why it was  
9 justifiable to specify the body mass category based on BMI and to investigate its influence on  
10 body posture in school-age children. In view of the fact that obesity is more and more common  
11 among children, schools should provide instruction on healthy diet and encourage students to  
12 take up physical activity.  
13  
14  
15  
16  
17  
18  
19

20 The results of the examinations made it possible to increase awareness among parents  
21 and primary school teachers related to the important role of body weight in a child's  
22 development, including the effects of this factor in body posture. Following the study, the  
23 headmasters of the relevant schools initiated cooperation with a Rehabilitation Centre offering  
24 specialist consultations and optional corrective exercise programs for children with postural  
25 defects. Overweight and obesity among children and adolescents should be prevented by  
26 introducing educational programs for whole families and showing them the negative impact  
27 of obesity on body posture.  
28  
29  
30  
31  
32  
33  
34

### 35 **Conclusions**

36 Increase in children's BMI produces adverse effects in the position of the shoulder  
37 blades, reflected by their greater distance from the frontal plane. Increase in BMI is not  
38 significantly related to the position of the shoulder joints or pelvis; however, the subjects with  
39 overweight or obesity presented a greater difference in the position of the shoulder joints and  
40 pelvis.  
41  
42  
43  
44  
45  
46  
47

### 48 **References**

- 49 1. Ferguson KT, Cassells RC, MacAllister JW, *et al.* The physical environment and child  
50 development: An international review. *Int J Psychol.* 2013;**48**: 437-468,  
51 <https://doi.org/10.1080/00207594.2013.804190>.
- 52 2. McEvoy MP, Grimmer K. Reliability of upright posture measurements in primary  
53 school children. *BMC Musculoskelet Disord.* .2005;**6**: 35, [https://doi.org/](https://doi.org/10.1186/1471-2474-6-35)  
54 [10.1186/1471-2474-6-35](https://doi.org/10.1186/1471-2474-6-35).  
55  
56  
57  
58  
59  
60

3. Mrozkowiak M, Walicka- Cupryś K, Magoń G. Comparison of Spinal Curvatures in the Sagittal Plane, as Well as Body Height and Mass in Polish Children and Adolescents examined in the Late 1950s and in the Early 2000s. *Med Sci Monit.* 2018;**24**: 4489-4500, <https://doi.org/10.12659/MSM.907134>.
4. Araújo FA, Lucas R, Simpkin AJ, *et al.* Associations of anthropometry since birth with sagittal posture at age 7 in a prospective birth cohort: the Generation XXI Study. *BMJ Open.* 2017;**7**: e013412, <https://doi.org/10.1136/bmjopen-2016-013412>.
5. Kowalski IM, Protasiewicz-Faldowska H, Siwik P, *et al.* Analysis of the sagittal plane in standing and sitting position in girls with left lumbar idiopathic scoliosis. *Pol Ann Med.* 2013;**1**: 30–34, <https://doi.org/10.1016/j.poamed.2013.07.001>.
6. Komro KA, Tobler AL, Delisle AL, *et al.* Beyond the clinic: improving child health through evidence-based community development. *BMC Pediatr.* 2013;**13**, 172, <https://doi.org/10.1186/1471-2431-13-172>.
7. WHO: Commission on Ending Childhood Obesity. "Facts and figures on childhood obesity". Last update: 13 October 2017. <https://www.who.int/end-childhood-obesity/facts/en/> 2019 ((accessed 14 June 2019)).
8. Barańska E, Gajewska E, Sobieska M. Obesity and the resulting motor organ problems versus motoric fitness in girls and boys with overweight and obesity. *Medical News.* 2012;**4**: 337–341.
9. Smith SM, Sumar B, Dixon KA. Musculoskeletal pain in overweight and obese children. *Int J Obes (Lond).* 2014; 1:11-15, <https://doi.org/10.1038/ijo.2013.187>.
10. Maciałczyk-Paprocka K, Stawińska-Witoszyńska B, Kotwicki T, *et al.* Prevalence of incorrect body posture in children and adolescents with overweight and obesity. *Eur J Pediatr.* 2017; **5**: 563-572, <https://doi.org/10.1007/s00431-017-2873-4>.
11. 10 facts on obesity, World Health Organization. <http://www.who.int/features/factfiles/obesity/en/> 2018 (accessed 2 May 2018).
12. Hruby A, Hu FB. The Epidemiology of Obesity: A Big Picture. *Pharmacoeconomics.* 2015;**7**: 673–689, <https://doi.org/10.1007/s40273-014-0243-x>.
13. Mazur A, The epidemiology of childhood overweight and obesity on the World, in Europe and in Poland. *Prz. Med. Uniw. Rzesz. Inst. Leków.* 2011;**2**: 158-163.
14. Villarrasa-Sapiña I, Álvarez-Pitti J, Cabeza-Ruiz R, *et al.* Relationship between body composition and postural control in prepubertal overweight/obese children: A cross-sectional study. *Clin Biomech (Bristol, Avon).* 2017; **52**: 1-6, <https://doi.org/10.1016/j.clinbiomech.2017>.

15. NCD Risk Factor Collaboration (NCD-RisC). Worldwide trends in body-mass index, underweight, overweight, and obesity from 1975 to 2016: a pooled analysis of 2416 population-based measurement studies in 128·9 million children, adolescents, and adults. *Lancet*. 2017; **390**: 2627-2642, [https://doi.org/10.1016/S0140-6736\(17\)32129-3](https://doi.org/10.1016/S0140-6736(17)32129-3).
16. Drzał-Grabiec J, Snela S, Truszczyńska A. The development of anterior-posterior spinal curvature in children aged 7-12 years. *Biomed Hum Kinet*. 2016;**8**: 72-82, <https://doi.org/10.1515/bhk-2016-0011>.
17. Latański M, Bylina J, Fatyga M, et al. Risk factors of postural defects in children at school age. *Ann Agric Environ Med*. 2013;**20**: 583-587.
18. Dereń K, Nyankovsky S, Nyankovska O, et al. The prevalence of underweight, overweight and obesity in children and adolescents from Ukraine. *Sci Rep*. 2018;**8**: 3625, <https://doi.org/10.1038/s41598-018-21773-4>.
19. Paranjape S, Ingole V. Prevalence of Back Pain in Secondary School Students in an Urban Population: Cross-sectional Study. *Cureus*. 2018;**10**: e2983, <https://doi.org/10.7759/cureus.2983>.
20. Maciańczyk-Paprocka K, Dudzińska J, Stawińska-Witoszyńska B, et al. Incidence of scoliotic posture in school screening of urban children and adolescents: the case of Poznań, Poland. *Anthropol Rev*, 2018;**81**: 341-350, <https://doi.org/10.2478/anre-2018-0030>.
21. Akbar F, AlBesharah M, Al-Baghli J, et al. Prevalence of low Back pain among adolescents in relation to the weight of school bags. *BMC Musculoskelet Disord*. 2019;**20**: 37. <https://doi.org/10.1186/s12891-019-2398-2>.
22. Dudonienė V, Šakalienė R, Švedienė L, et al. Differences of age and gender related posture in urban and rural schoolchildren aged 7 to 10. *Education. Physical Training. Sport*. 2013;**1**: 25-31.
23. Drzał-Grabiec J, Snela S. The influence of rural environment on body posture. *Ann Agric Environ Med*. 2012;**19**: 846-850.
24. Wszyńska J, Podgórska-Bednarz J, Drzał-Grabiec J, et al. Analysis of Relationship between the Body Mass Composition and Physical Activity with Body Posture in Children. *BioMed Res Int*. 2016; Article ID 1851670: 10 pages, <https://doi.org/10.1155/2016/1851670>.

- 1  
2  
3 25. Walicka- Cupryś K, Skalska-Izdebska R, Drzał-Grabiec J, *et al.* Correlation between  
4 body posture and postural stability of school children. *Advances in Rehabilitation*.  
5 2013;**4**: 47-54, <https://doi.org/10.2478/rehab-2014-0026>.  
6  
7  
8 26. Illyés A, Kiss RM. Method for determining the spatial position of the shoulder with  
9 ultrasound-based motion analyzer. *J Electromyogr Kinesiol*. 2006;**16**: 79-88,  
10 <https://doi.org/10.1016/j.jelekin.2005.06.007>.  
11  
12 27. Rusek W, Pop T, Glista J, *et al.* Assessment of student's body posture with the use of  
13 Zebris system. *Prz. Med. Uniw. Rzesz. Inst. Leków*. 2010; **3**: 277-288.  
14  
15 28. Barlow SE. Expert Committee, Expert committee recommendations regarding the  
16 prevention, assessment, and treatment of child and adolescent overweight and obesity:  
17 summary report. *Pediatrics*. 2007; **120**: 164-192, [https://doi.org/10.1542/peds.2007-](https://doi.org/10.1542/peds.2007-2329C)  
18 [2329C](https://doi.org/10.1542/peds.2007-2329C).  
19  
20 29. Walicka-Cupryś K, Piwoński P, Rachwał M, *et al.* Shape of sagittal plane spinal  
21 curvatures in prematurely born children at the start of school education. *J Novel*  
22 *Physiotherapies*. 2017; **5**: 49.  
23  
24 30. Brzęk A, Dworak T, Strauss M, *et al.* The weight of pupils' schoolbags in early school  
25 age and its influence on body posture. *BMC Musculoskel Dis*. 2017;**18**:117,  
26 <https://doi.org/10.1186/s12891-017-1462-z>.  
27  
28 31. Villarrasa-Sapiña I, García-Massó X, Serra-Añó P, *et al.* Differences in intermittent  
29 postural control between normal-weight and obese children. *Gait Posture*. 2016;**49**: 1-  
30 6. <https://doi.org/10.1016/j.gaitpost.2016.06.012>.  
31  
32 32. Maciałczyk-Paprocka M, Krzyżaniak A, Kotwicki T, *et al.* Postural defects in primary  
33 school students in Poznan. *Probl Hig Epidemiol*. 2012;**2**: 309-314.  
34  
35 33. Kapo S, Rađo I, Smajlović N, *et al.* Increasing Postural Deformity Trends and Body  
36 Mass Index Analysis in School-age Children. *Zdravstveno varstvo*. 2018; 1:25-32,  
37 <https://doi.org/10.2478/sjph-2018-0004>.  
38  
39 34. Walicka-Cupryś K, Skalska-Izdebska R, Rachwał M, *et al.* Influence of the Weight of  
40 a School Backpack on Spinal Curvature in the Sagittal Plane of Seven-Year-Old  
41 Children. *BioMed Res Int*. 2015; Article ID 817913: 6 pages.  
42 <https://doi.org/10.1155/2015/817913>.  
43  
44 35. Global Health Observatory (GHO) data. [www.who.int](http://www.who.int) (accessed 7 August 2018).  
45  
46 36. Batistaõ MV, de Fátima Carreira Moreira R, Cote Gil Coury HJ, *et al.* Prevalence of  
47 postural deviations and associated factors in children and adolescents: a cross-sectional  
48  
49  
50  
51  
52  
53  
54  
55  
56  
57  
58  
59  
60

- study. *Fisioter. Mov.* 2016;**4**: 778-785, <https://doi.org/10.1590/1980-5918.029.004.ao14>.
37. Barszczyk K, Skolimowski T, Anwajer J, *et al.* Somatic features and parameters of anterior posterior spinal curvature in 7 years old with particular posture types. *Ortop. Traumatol. Rehabil.* 2005;**5**: 555-562.
38. Pausić J, Cavala M, Katić R. Relations of the morphological characteristic latent structure and body posture indicators in children ages seven to nine years. *Coll. Antropol.* 2006;**3**: 621-627.
39. Bogucka A, Głębocka A. Body posture of children aged 9 –12 years as related to their body mass index (BMI). *Physical Activity and Health.* 2017;**12**: 1-17.
40. Grivas TB, Burwell RG, Mihas C, *et al.* Relatively lower body mass index is associated with an excess of severe truncal asymmetry in healthy adolescents: Do white adipose tissue, leptin, hypothalamus and sympathetic nervous system influence truncal growth asymmetry? *Scoliosis.* 2009;**4**: <https://doi.org/10.1186/1748-7161-4-13>.
41. Grabara M, Pstrągowska D. Estimation of the body posture in girls and boys related to their body mass index (BMI). *Med. Sport.* 2008;**4**; 231-239.
42. Rosa K, Muszkieta R, Zukow W, *et al.* The incidence of defects posture in children from classes I to III Elementary School. *J Health Sci.* 2013;**3**: 107-136,
43. Słoń A. The incidence of selected postural disorders in children aged 10 –12 years. *WSKFiT.* 2015;**10**:49-55.

### Acknowledgement

We are grateful to the participants and their families who volunteered their time to participate in this research.

### Authors' contributions

WR- conception and design, revising critically for intellectual content, final approval of the manuscript, JL- acquisition of data, drafting the article, final approval of the manuscript; JB- acquisition of data, revising critically for intellectual content, final approval of the manuscript; MA- analysis and interpretation of data, drafting the article, final approval of the manuscript; Weres Aneta,- analysis and interpretation of data, drafting the article, final approval of the manuscript; RB- acquisition of data, drafting the article, final approval of the manuscript, GI- acquisition of data, revising critically for intellectual content, final approval of the manuscript;

1  
2  
3 ECL- acquisition of data, revising critically for intellectual content, final approval of the  
4 manuscript, SP- acquisition of data, drafting the article, final approval of the manuscript; TP  
5 conception and design, revising critically for intellectual content, final approval of the  
6 manuscript.  
7  
8  
9

### 10 **Funding**

11 This research received no specific grant from any funding agency in the public, commercial  
12 or not-for-profit sectors.  
13  
14

### 15 **Conflicts of interest**

16 None declared.  
17  
18  
19

### 20 **Data sharing statement**

21 The datasets generated and/or analysed during the current study are not publicly available due  
22 to protect the students' privacy, but are available from the corresponding author on reasonable  
23 request.  
24  
25  
26  
27

### 28 **Figure legend**

29 Fig. 1 Topographic points marked on the body of patients  
30

31 Fig. 2 The difference in the distance of the scapula in the sagittal projection  
32

33 Fig. 3 Pelvic height difference and shoulder height difference in the frontal projection  
34  
35  
36  
37  
38  
39  
40  
41  
42  
43  
44  
45  
46  
47  
48  
49  
50  
51  
52  
53  
54  
55  
56  
57  
58  
59  
60

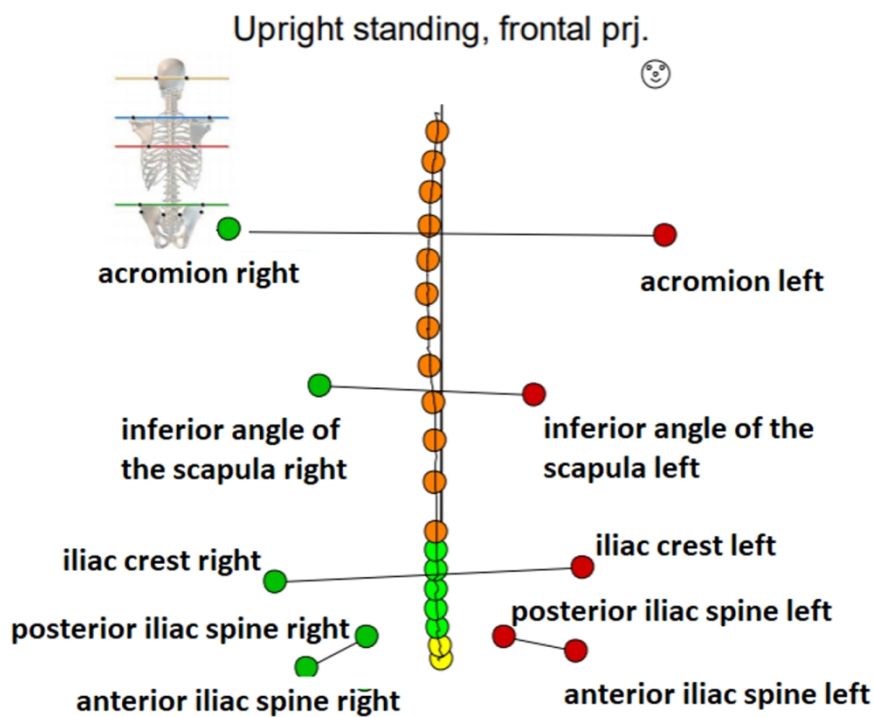

Fig. 1 Topographic points marked on the body of patients

129x93mm (300 x 300 DPI)

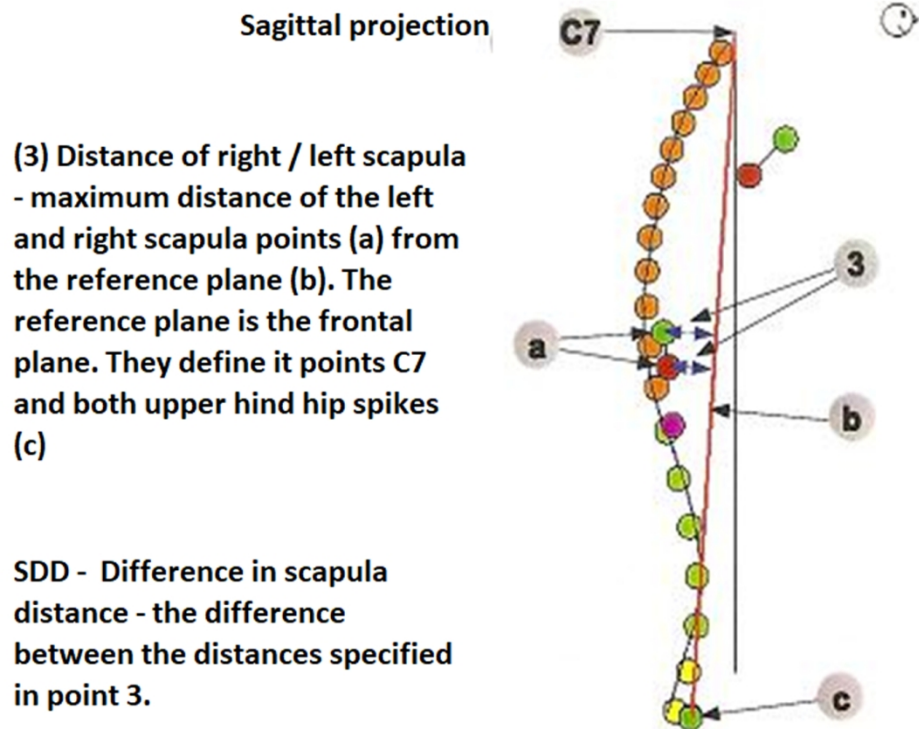

Fig. 2 The difference in the distance of the scapula in the sagittal projection.

128x95mm (300 x 300 DPI)



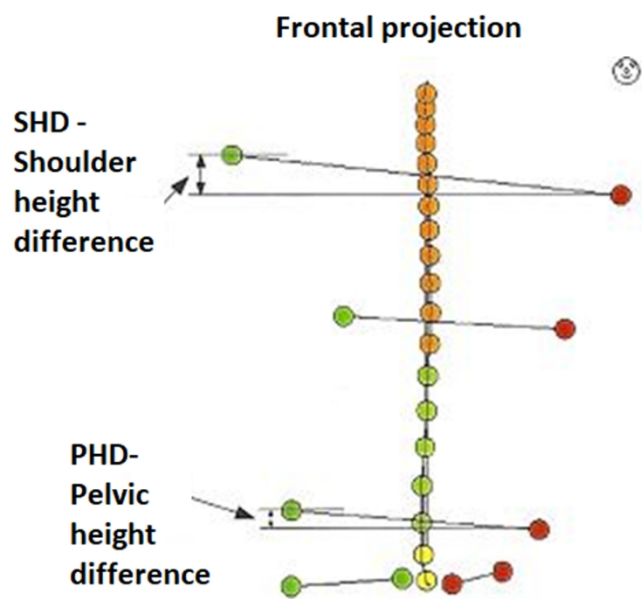

Fig. 3 Pelvic height difference and shoulder height difference in the frontal projection.

128x93mm (300 x 300 DPI)

**STROBE 2007 (v4) Statement—Checklist of items that should be included in reports of *cross-sectional studies***

| Section/Topic                | Item # | Recommendation                                                                                                                                                                       | Reported on page # |
|------------------------------|--------|--------------------------------------------------------------------------------------------------------------------------------------------------------------------------------------|--------------------|
| <b>Title and abstract</b>    | 1      | (a) Indicate the study’s design with a commonly used term in the title or the abstract                                                                                               | 1                  |
|                              |        | (b) Provide in the abstract an informative and balanced summary of what was done and what was found                                                                                  | 2                  |
| <b>Introduction</b>          |        |                                                                                                                                                                                      |                    |
| Background/rationale         | 2      | Explain the scientific background and rationale for the investigation being reported                                                                                                 | 3-4                |
| Objectives                   | 3      | State specific objectives, including any prespecified hypotheses                                                                                                                     | 4                  |
| <b>Methods</b>               |        |                                                                                                                                                                                      |                    |
| Study design                 | 4      | Present key elements of study design early in the paper                                                                                                                              | 5                  |
| Setting                      | 5      | Describe the setting, locations, and relevant dates, including periods of recruitment, exposure, follow-up, and data collection                                                      | 5                  |
| Participants                 | 6      | (a) Give the eligibility criteria, and the sources and methods of selection of participants                                                                                          | 5                  |
| Variables                    | 7      | Clearly define all outcomes, exposures, predictors, potential confounders, and effect modifiers. Give diagnostic criteria, if applicable                                             | 5-7                |
| Data sources/<br>measurement | 8*     | For each variable of interest, give sources of data and details of methods of assessment (measurement). Describe comparability of assessment methods if there is more than one group | n/a                |
| Bias                         | 9      | Describe any efforts to address potential sources of bias                                                                                                                            | 5                  |
| Study size                   | 10     | Explain how the study size was arrived at                                                                                                                                            | 5                  |
| Quantitative variables       | 11     | Explain how quantitative variables were handled in the analyses. If applicable, describe which groupings were chosen and why                                                         | n/a                |
| Statistical methods          | 12     | (a) Describe all statistical methods, including those used to control for confounding                                                                                                | 8                  |
|                              |        | (b) Describe any methods used to examine subgroups and interactions                                                                                                                  | 8                  |
|                              |        | (c) Explain how missing data were addressed                                                                                                                                          | 8                  |
|                              |        | (d) If applicable, describe analytical methods taking account of sampling strategy                                                                                                   | 8                  |
|                              |        | (e) Describe any sensitivity analyses                                                                                                                                                | 8                  |
| <b>Results</b>               |        |                                                                                                                                                                                      |                    |

|                          |     |                                                                                                                                                                                                              |       |
|--------------------------|-----|--------------------------------------------------------------------------------------------------------------------------------------------------------------------------------------------------------------|-------|
| Participants             | 13* | (a) Report numbers of individuals at each stage of study—eg numbers potentially eligible, examined for eligibility, confirmed eligible, included in the study, completing follow-up, and analysed            | 5     |
|                          |     | (b) Give reasons for non-participation at each stage                                                                                                                                                         | 5     |
|                          |     | (c) Consider use of a flow diagram                                                                                                                                                                           | n/a   |
| Descriptive data         | 14* | (a) Give characteristics of study participants (eg demographic, clinical, social) and information on exposures and potential confounders                                                                     | n/a   |
|                          |     | (b) Indicate number of participants with missing data for each variable of interest                                                                                                                          | n/a   |
| Outcome data             | 15* | Report numbers of outcome events or summary measures                                                                                                                                                         | n/a   |
| Main results             | 16  | (a) Give unadjusted estimates and, if applicable, confounder-adjusted estimates and their precision (eg, 95% confidence interval). Make clear which confounders were adjusted for and why they were included | 9     |
|                          |     | (b) Report category boundaries when continuous variables were categorized                                                                                                                                    | n/a   |
|                          |     | (c) If relevant, consider translating estimates of relative risk into absolute risk for a meaningful time period                                                                                             | n/a   |
| Other analyses           | 17  | Report other analyses done—eg analyses of subgroups and interactions, and sensitivity analyses                                                                                                               | n/a   |
| <b>Discussion</b>        |     |                                                                                                                                                                                                              |       |
| Key results              | 18  | Summarise key results with reference to study objectives                                                                                                                                                     | 12    |
| Limitations              | 19  | Discuss limitations of the study, taking into account sources of potential bias or imprecision. Discuss both direction and magnitude of any potential bias                                                   | 10-12 |
| Interpretation           | 20  | Give a cautious overall interpretation of results considering objectives, limitations, multiplicity of analyses, results from similar studies, and other relevant evidence                                   | 10-12 |
| Generalisability         | 21  | Discuss the generalisability (external validity) of the study results                                                                                                                                        | 10-12 |
| <b>Other information</b> |     |                                                                                                                                                                                                              |       |
| Funding                  | 22  | Give the source of funding and the role of the funders for the present study and, if applicable, for the original study on which the present article is based                                                | 17    |

\*Give information separately for cases and controls in case-control studies and, if applicable, for exposed and unexposed groups in cohort and cross-sectional studies.

**Note:** An Explanation and Elaboration article discusses each checklist item and gives methodological background and published examples of transparent reporting. The STROBE checklist is best used in conjunction with this article (freely available on the Web sites of PLoS Medicine at <http://www.plosmedicine.org/>, Annals of Internal Medicine at <http://www.annals.org/>, and Epidemiology at <http://www.epidem.com/>). Information on the STROBE Initiative is available at [www.strobe-statement.org](http://www.strobe-statement.org).
